# Supplementary material for: Palladium-catalyzed asymmetric allylic amination of racemic butadiene monoxide with isatin derivatives
Source: Royal Society of Chemistry journal article supplement (doi:10.1039/c5ob00663e), 2015-01-01
Supplement: c5ob00663e1.pdf [file c5ob00663e1.pdf]

**Palladium-Catalyzed Asymmetric Allylic Amination of Racemic Butadiene  
Monoxide with Isatin Derivatives**

Gen Li, Xiangqing Feng\* and Haifeng Du\*

*Beijing National Laboratory for Molecular Sciences, CAS Key Laboratory of Molecular Recognition and  
Function, Institute of Chemistry, Chinese Academy of Sciences, Beijing 100190.*

**Supporting Information**

**General consideration:** All solvents were purified by conventional methods, distilled before use.  $^1\text{H}$  NMR and  $^{13}\text{C}$  NMR spectra were recorded on Bruker AV 400 at ambient temperature with  $\text{CDCl}_3$  and  $\text{DMSO-}d_6$  as solvent and TMS as internal standard. Chemical shifts ( $\delta$ ) were given in ppm, referenced to the residual proton resonance of TMS (0), to the carbon resonance of the  $\text{CDCl}_3$  (77.23) and  $\text{DMSO-}d_6$  (40.45). Coupling constants ( $J$ ) were given in Hertz (Hz). Optical rotations were measured with PerkinElmer 341 polarimeter. Flash column chromatography was performed on silica gel (200-300 mesh). All solvents were purified by conventional methods, distilled before use. Commercially available reagents were used without further purification.

**Typical procedure for the synthesis of substrate 1a:** A mixture of isatin (5.0 mmol), malononitrile (0.302 g, 5.5 mmol) and piperidine (0.05 mL) in EtOH (10 mL) was stirred at room temperature for 4 h. After filtration and removal of the solvents, the residue was recrystallized from ethanol to give the pure substrate.

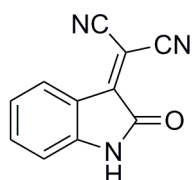

**2-(2-oxoindolin-3-ylidene)malononitrile (1a)<sup>1</sup>:**  $^1\text{H}$  NMR (400 MHz,  $\text{DMSO-}d_6$ ):  $\delta$  11.21 (s, 1H), 7.89 (d,  $J = 8.0$  Hz, 1H), 7.57 (dd,  $J = 8.0, 7.6$  Hz, 1H), 7.14 (dd,  $J = 8.0, 7.6$  Hz, 1H), 6.93 (d,  $J = 8.0$  Hz, 1H);  $^{13}\text{C}$  NMR (100 MHz,  $\text{DMSO-}d_6$ ):  $\delta$  164.7, 151.5, 147.4, 138.7, 126.7, 123.8, 119.6, 114.0, 112.5, 112.4, 81.5.

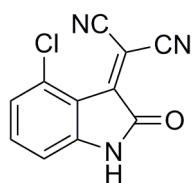

**2-(4-chloro-2-oxoindolin-3-ylidene)malononitrile (1b)**<sup>1</sup>: <sup>1</sup>H NMR (400 MHz, DMSO-*d*<sub>6</sub>): δ 11.46 (s, 1H), 7.54 (dd, *J* = 8.0, 8.0 Hz, 1H), 7.12 (d, *J* = 8.0 Hz, 1H), 6.87 (d, *J* = 8.0 Hz, 1H); <sup>13</sup>C NMR (100 MHz, DMSO-*d*<sub>6</sub>): δ 163.7, 148.2, 148.1, 138.6, 132.8, 124.4, 116.7, 114.1, 112.9, 110.3, 83.9.

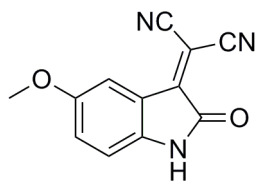

**2-(5-methoxy-2-oxoindolin-3-ylidene)malononitrile (1c)**<sup>2</sup>: <sup>1</sup>H NMR (400 MHz, DMSO-*d*<sub>6</sub>): δ 10.99 (s, 1H), 7.31 (d, *J* = 2.4 Hz, 1H), 7.17 (dd, *J* = 8.4, 2.4 Hz, 1H), 6.82 (d, *J* = 8.4 Hz, 1H), 3.74 (s, 3H); <sup>13</sup>C NMR (100 MHz, DMSO-*d*<sub>6</sub>): δ 164.6, 155.7, 151.5, 141.5, 125.0, 119.8, 113.8, 113.4, 1112.3, 111.0, 81.6, 56.5.

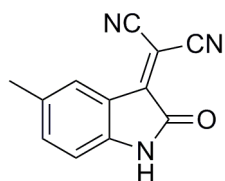

**2-(5-methyl-2-oxoindolin-3-ylidene)malononitrile (1d)**<sup>3</sup>: <sup>1</sup>H NMR (400 MHz, DMSO-*d*<sub>6</sub>): δ 11.10 (s, 1H), 7.66 (s, 1H), 7.40 (d, *J* = 8.0 Hz, 1H), 6.84 (d, *J* = 8.0 Hz, 1H), 2.28 (s, 3H); <sup>13</sup>C NMR (100 MHz, DMSO-*d*<sub>6</sub>): δ 164.7, 151.5, 145.4, 139.5, 132.9, 126.6, 119.6, 114.0, 112.5, 112.5, 81.2, 21.4.

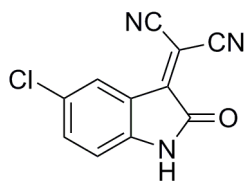

**2-(5-chloro-2-oxoindolin-3-ylidene)malononitrile (1e)**<sup>4</sup>: <sup>1</sup>H NMR (400 MHz, DMSO-*d*<sub>6</sub>): δ 11.36 (s, 1H), 7.77 (s, 1H), 7.63 (d, *J* = 7.6 Hz, 1H), 6.97 (d, *J* = 8.4 Hz, 1H); <sup>13</sup>C NMR (100 MHz, DMSO-*d*<sub>6</sub>): δ 164.4, 150.6, 146.1, 137.8, 127.4, 125.7, 120.9, 114.2, 113.7, 112.1, 82.9.

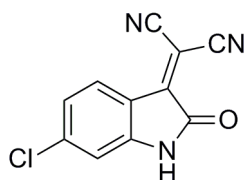

**2-(6-chloro-2-oxoindolin-3-ylidene)malononitrile (1f)**<sup>5</sup>: <sup>1</sup>H NMR (400 MHz, DMSO-*d*<sub>6</sub>): δ 11.39 (s, 1H), 7.86 (d, *J* = 8.4 Hz, 1H), 7.22 (dd, *J* = 8.4, 1.6 Hz, 1H), 6.98 (d, 1.6 Hz, 1H); <sup>13</sup>C NMR (100 MHz, DMSO-*d*<sub>6</sub>): δ 164.7, 150.4, 148.5, 142.8, 128.1, 123.9, 118.5, 113.9, 112.6, 112.3, 81.9.

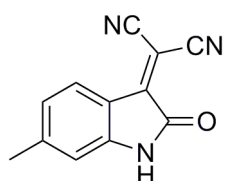

**2-(6-methyl-2-oxoindolin-3-ylidene)malononitrile (1g)**<sup>6</sup>: Purple solid; mp. 296-298 °C; IR (film) 3273, 1723, 1631, 1596 cm<sup>-1</sup>; <sup>1</sup>H NMR (400 MHz, DMSO-*d*<sub>6</sub>): δ 11.17 (s, 1H), 7.75 (d, *J* = 8.0 Hz, 1H), 6.95 (d, *J* = 8.0 Hz, 1H), 6.76 (s, 1H), 2.37 (s, 3H); <sup>13</sup>C NMR (100 MHz, DMSO-*d*<sub>6</sub>): δ 164.1, 150.3, 150.0, 146.9, 125.8, 123.8, 116.2, 113.3, 112.1, 111.7, 78.9, 22.3; HRMS (ESI): Calcd. for C<sub>12</sub>H<sub>7</sub>ON<sub>3</sub>Na (M+Na): 232.0481; Found: 232.0484.

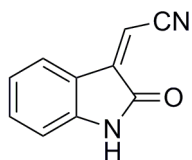

**(Z)-2-(2-oxoindolin-3-ylidene)acetonitrile (1h)**<sup>7</sup>: <sup>1</sup>H NMR (400 MHz, CDCl<sub>3</sub>): δ 10.89 (s, 1H), 7.86 (d, *J* = 7.6 Hz, 1H), 7.42 (dd, *J* = 7.6, 7.6 Hz, 1H), 7.10 (dd, *J* = 7.6, 7.6 Hz, 1H), 6.92 (d, *J* = 8.0 Hz, 1H), 6.53 (s, 1H); <sup>13</sup>C NMR (100 MHz, CDCl<sub>3</sub>): δ 166.9, 145.6, 144.7, 134.8, 124.9, 123.3, 120.3, 117.8, 111.9, 98.6.

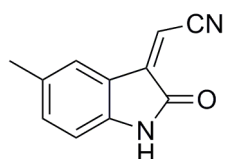

**(Z)-2-(5-methyl-2-oxoindolin-3-ylidene)acetonitrile (1i)**<sup>8</sup>: Red solid; mp. 167-169 °C; IR (film) 3237, 2213, 1731, 1720 cm<sup>-1</sup>; <sup>1</sup>H NMR (400 MHz, CDCl<sub>3</sub>): δ 7.87 (s, 1H), 7.61(brs, 1H), 7.20 (d, *J* = 8.0 Hz, 1H), 6.77 (d, *J* = 8.0 Hz, 1H), 6.27 (s, 1H), 2.36 (s, 3H); <sup>13</sup>C NMR (100 MHz, CDCl<sub>3</sub>): δ 167.1, 144.1, 140.9, 134.6, 133.3, 125.9, 120.1, 116.3, 110.7, 97.5, 21.2; HRMS (ESI): Calcd. for C<sub>11</sub>H<sub>8</sub>ON<sub>2</sub>Na (M+Na): 207.0529; Found: 207.0532.

## References

- [1] H. Fayez and A. Fatma, *Tetrahedron*, 2000, **56**, 1863-1871.
- [2] C. Yu and Y. Cai, *RSC Advances*, 2013, **3**, 18857-18862.
- [3] A. Dandia, H. Taneja, R. Gupta and S. Paul, *Synth. Commun.* 1999, **29**, 2323-2335.
- [4] P. B. Thakur and H. M. Meshram, *Tetrahedron*, 2013, **69**, 6415-6423.
- [5] L. Liu, D. Wu, X. Li, S. Wang, H. Li, J. Li and W. Wang, *Chem. Commun.* 2012, **48**, 1692-1694.
- [6] Y. B. Lan, H. Zhao and X. Wang, *Org. Lett.*, 2011, **13**, 4866-4869.
- [7] E. Samahy, A. Fatma and F. Osman, *Tetrahedron*, 2000, **56**, 1863-1867.

## The chromatography for the determination of enantiomeric excess

**Table 2, entry 1**

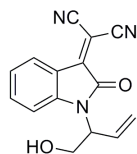

**HPLC Conditions: Column:** Chiralpak OD-H, Daicel Chemical Industries, Ltd., **Eluent:** Hexanes/IPA (80/20); **Flow rate:** 1.0 mL/min; **Detection:** UV 254 nm

**Racemic**

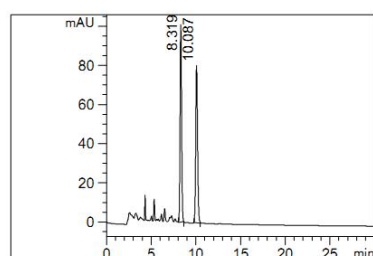

| Peak # | RT [min] | Area % | Area    |
|--------|----------|--------|---------|
| 1      | 8.319    | 50.187 | 1.177e3 |
| 2      | 10.087   | 49.813 | 1.168e3 |

**Chiral**

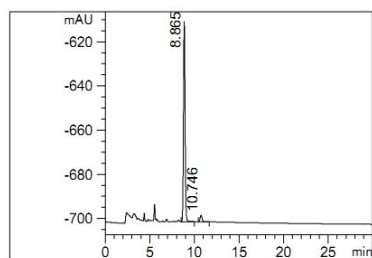

| Peak # | RT [min] | Area % | Area    |
|--------|----------|--------|---------|
| 1      | 8.865    | 96.068 | 1.112e3 |
| 2      | 10.746   | 3.932  | 45.518  |

**Table 2, entry 2**

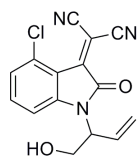

**HPLC Conditions: Column:** Chiralpak OD-H, Daicel Chemical Industries, Ltd., **Eluent:** Hexanes/IPA (80/20); **Flow rate:** 1.0 mL/min; **Detection:** UV 254 nm

**Racemic**

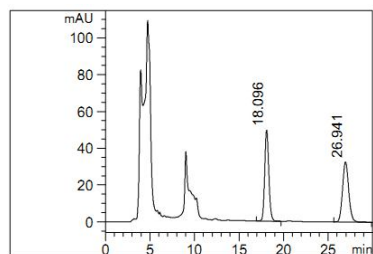

| Peak # | RT [min] | Area % | Area    |
|--------|----------|--------|---------|
| 1      | 18.096   | 50.192 | 1.593e3 |
| 2      | 26.941   | 49.808 | 1.580e3 |

**Chiral**

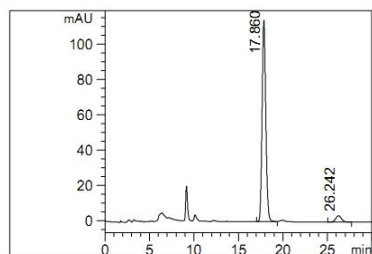

| Peak # | RT [min] | Area % | Area    |
|--------|----------|--------|---------|
| 1      | 17.860   | 95.310 | 3.303e3 |
| 2      | 26.242   | 4.690  | 162.554 |

**Table 2, entry 3**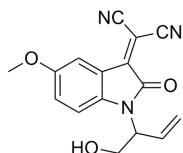

**HPLC Conditions: Column:** Chiralpak OD-H, Daicel Chemical Industries, Ltd., **Eluent:** Hexanes/IPA (80/20); **Flow rate:** 1.0 mL/min; **Detection:** UV 254 nm

**Racemic**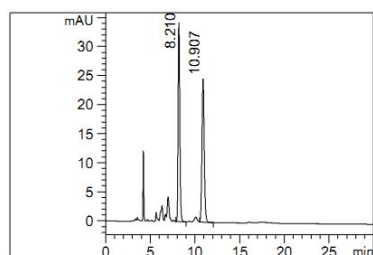

| Peak # | RT [min] | Area % | Area    |
|--------|----------|--------|---------|
| 1      | 8.210    | 50.388 | 450.765 |
| 2      | 10.907   | 49.612 | 443.815 |

**Chiral**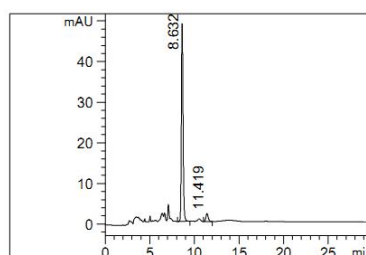

| Peak # | RT [min] | Area % | Area    |
|--------|----------|--------|---------|
| 1      | 8.632    | 94.861 | 647.224 |
| 2      | 11.419   | 5.139  | 35.062  |

**Table 2, entry 4**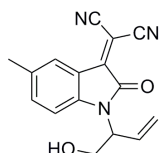

**HPLC Conditions: Column:** Chiralpak OD-H, Daicel Chemical Industries, Ltd., **Eluent:** Hexanes/IPA (80/20); **Flow rate:** 1.0 mL/min; **Detection:** UV 254 nm

**Racemic**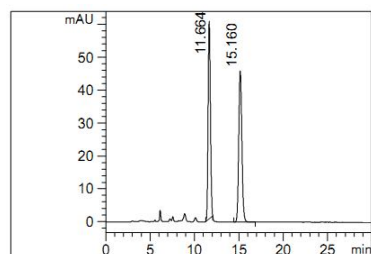

| Peak # | RT [min] | Area % | Area    |
|--------|----------|--------|---------|
| 1      | 11.664   | 48.791 | 1.078e3 |
| 2      | 15.160   | 51.209 | 1.131e3 |

**Chiral**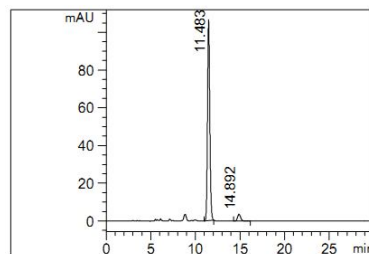

| Peak # | RT [min] | Area % | Area    |
|--------|----------|--------|---------|
| 1      | 11.483   | 95.582 | 1.924e3 |
| 2      | 14.892   | 4.418  | 88.914  |

**Table 2, entry 5**

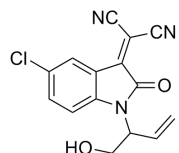

**HPLC Conditions: Column:** Chiralpak OD-H, Daicel Chemical Industries, Ltd., **Eluent:** Hexanes/IPA (80/20); **Flow rate:** 1.0 mL/min; **Detection:** UV 254 nm

**Racemic**

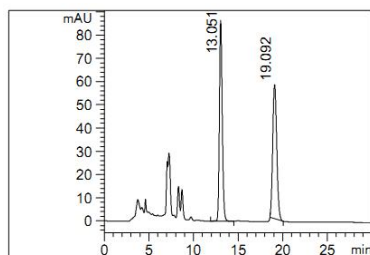

| Peak # | RT [min] | Area % | Area    |
|--------|----------|--------|---------|
| 1      | 13.051   | 51.612 | 1.942e3 |
| 2      | 19.092   | 48.388 | 1.821e3 |

**Chiral**

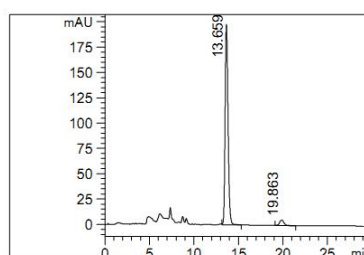

| Peak # | RT [min] | Area % | Area    |
|--------|----------|--------|---------|
| 1      | 13.659   | 96.082 | 4.525e3 |
| 2      | 19.863   | 3.918  | 184.503 |

**Table 2, entry 6**

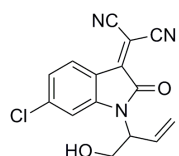

**HPLC Conditions: Column:** Chiralpak OD-H, Daicel Chemical Industries, Ltd., **Eluent:** Hexanes/IPA (80/20); **Flow rate:** 1.0 mL/min; **Detection:** UV 254 nm

**Racemic**

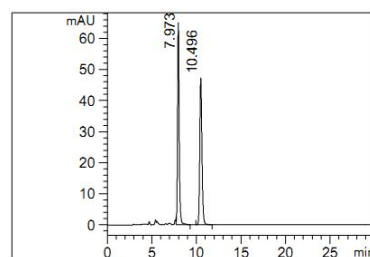

| Peak # | RT [min] | Area % | Area    |
|--------|----------|--------|---------|
| 1      | 7.973    | 50.910 | 844.195 |
| 2      | 10.496   | 49.090 | 814.004 |

**Chiral**

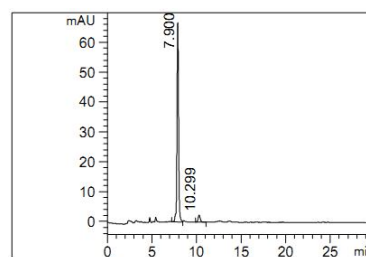

| Peak # | RT [min] | Area % | Area    |
|--------|----------|--------|---------|
| 1      | 7.900    | 95.500 | 826.043 |
| 2      | 10.299   | 4.500  | 38.925  |



**Table 2, entry 7**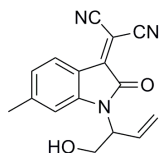

**HPLC Conditions: Column:** Chiralpak OD-H, Daicel Chemical Industries, Ltd., **Eluent:** Hexanes/IPA (80/20); **Flow rate:** 1.0 mL/min; **Detection:** UV 254 nm

**Racemic**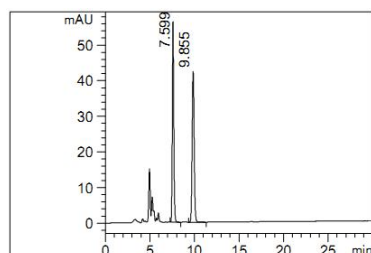

| Peak # | RT [min] | Area % | Area    |
|--------|----------|--------|---------|
| 1      | 7.599    | 50.023 | 666.850 |
| 2      | 9.855    | 49.977 | 666.225 |

**Chiral**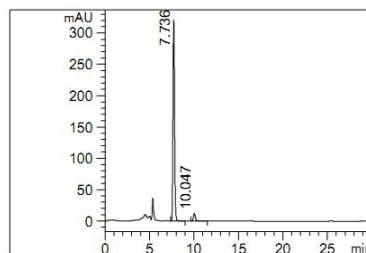

| Peak # | RT [min] | Area % | Area    |
|--------|----------|--------|---------|
| 1      | 7.736    | 95.301 | 3.884e3 |
| 2      | 10.047   | 4.699  | 191.540 |

**Table 2, entry 8**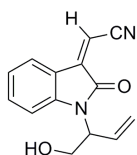

**HPLC Conditions: Column:** Chiralpak OD-H, Daicel Chemical Industries, Ltd., **Eluent:** Hexanes/IPA (90/10); **Flow rate:** 1.0 mL/min; **Detection:** UV 254 nm

**Racemic**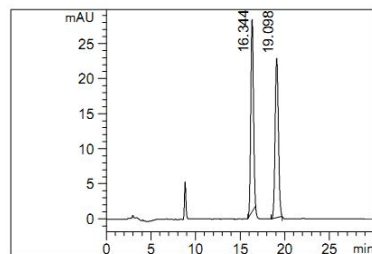

| Peak # | RT [min] | Area % | Area    |
|--------|----------|--------|---------|
| 1      | 16.344   | 49.712 | 575.863 |
| 2      | 19.098   | 50.288 | 582.547 |

**Chiral**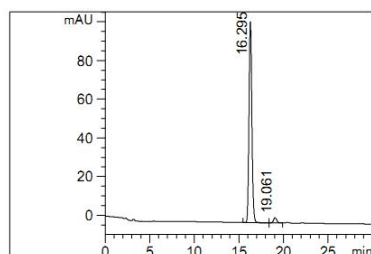

| Peak # | RT [min] | Area % | Area    |
|--------|----------|--------|---------|
| 1      | 16.295   | 97.034 | 2.340e3 |
| 2      | 19.061   | 2.966  | 71.516  |

**Table 2, entry 9**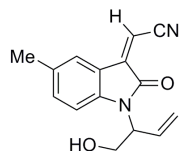

**HPLC Conditions: Column:** Chiralpak OD-H, Daicel Chemical Industries, Ltd., **Eluent:** Hexanes/IPA (90/10); **Flow rate:** 1.0 mL/min; **Detection:** UV 254 nm

**Racemic**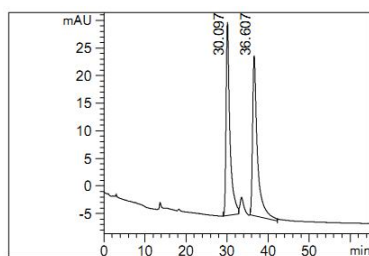

| Peak # | RT [min] | Area % | Area    |
|--------|----------|--------|---------|
| 1      | 30.097   | 49.019 | 2.278e3 |
| 2      | 36.607   | 50.981 | 2.369e3 |

**Chiral**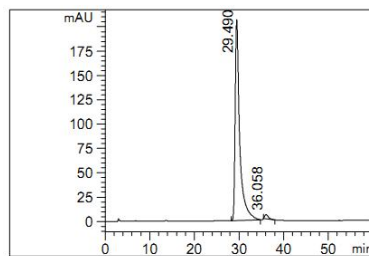

| Peak # | RT [min] | Area % | Area    |
|--------|----------|--------|---------|
| 1      | 29.490   | 98.307 | 1.467e4 |
| 2      | 36.058   | 1.693  | 252.537 |

**Table 2, entry 10**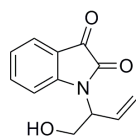

**HPLC Conditions: Column:** Chiralpak OD-H, Daicel Chemical Industries, Ltd., **Eluent:** Hexanes/IPA (95/5); **Flow rate:** 1.0 mL/min; **Detection:** UV 254 nm

**Racemic**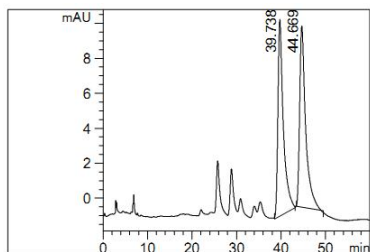

| Peak # | RT [min] | Area % | Area    |
|--------|----------|--------|---------|
| 1      | 39.738   | 49.541 | 953.067 |
| 2      | 44.669   | 50.459 | 970.728 |

**Chiral**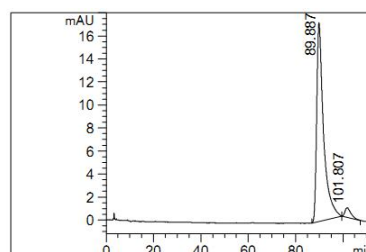

| Peak # | RT [min] | Area % | Area    |
|--------|----------|--------|---------|
| 1      | 39.735   | 96.592 | 1.129e4 |
| 2      | 44.617   | 3.408  | 398.423 |

**Table 2, entry 11**

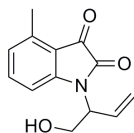

**HPLC Conditions: Column:** Chiralpak OD-H, Daicel Chemical Industries, Ltd., **Eluent:** Hexanes/IPA (95/5); **Flow rate:** 1.0 mL/min; **Detection:** UV 254 nm

**Racemic**

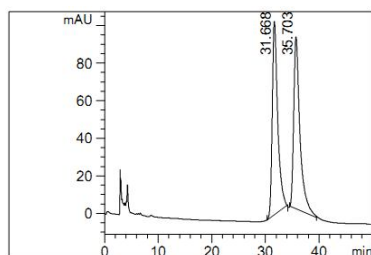

| Peak # | RT [min] | Area % | Area    |
|--------|----------|--------|---------|
| 1      | 31.668   | 49.582 | 7.276e3 |
| 2      | 35.703   | 50.418 | 7.398e3 |

**Chiral**

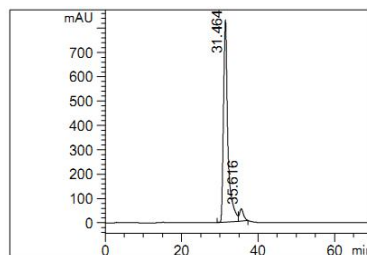

| Peak # | RT [min] | Area % | Area    |
|--------|----------|--------|---------|
| 1      | 31.464   | 94.626 | 6.678e4 |
| 2      | 35.616   | 5.374  | 3.793e3 |

**Table 2, entry 12**

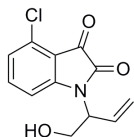

**HPLC Conditions: Column:** Chiralpak OD-H, Daicel Chemical Industries, Ltd., **Eluent:** Hexanes/IPA (95/5); **Flow rate:** 1.0 mL/min; **Detection:** UV 254 nm

**Racemic**

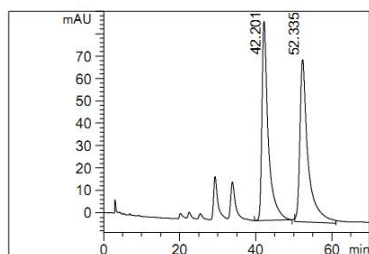

| Peak # | RT [min] | Area % | Area    |
|--------|----------|--------|---------|
| 1      | 42.201   | 48.966 | 1.025e4 |
| 2      | 52.335   | 51.034 | 1.068e4 |

**Chiral**

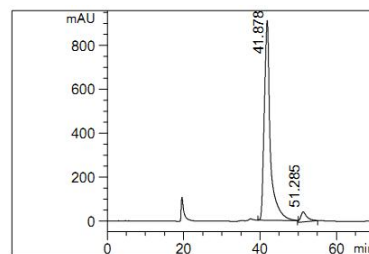

| Peak # | RT [min] | Area % | Area    |
|--------|----------|--------|---------|
| 1      | 41.878   | 94.982 | 9.872e4 |
| 2      | 51.285   | 5.018  | 5.215e3 |

**Table 2, entry 13**

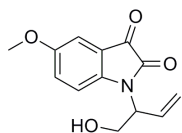

**HPLC Conditions: Column:** Chiralpak OD-H, Daicel Chemical Industries, Ltd., **Eluent:** Hexanes/IPA (99/1); **Flow rate:** 1.0 mL/min; **Detection:** UV 254 nm

**Racemic**

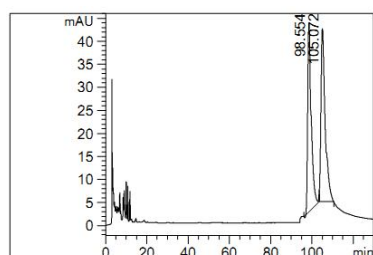

| Peak # | RT [min] | Area % | Area    |
|--------|----------|--------|---------|
| 1      | 98.553   | 49.989 | 5.060e3 |
| 2      | 105.077  | 50.011 | 5.062e3 |

**Chiral**

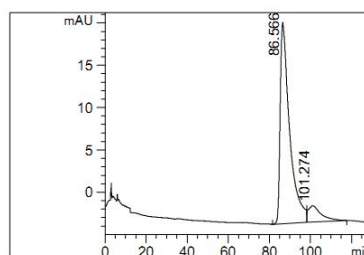

| Peak # | RT [min] | Area % | Area    |
|--------|----------|--------|---------|
| 1      | 86.566   | 89.861 | 7.615e3 |
| 2      | 101.274  | 10.139 | 859.209 |

**Table 2, entry 14**

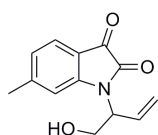

**HPLC Conditions: Column:** Chiralpak OD-H, Daicel Chemical Industries, Ltd., **Eluent:** Hexanes/IPA (95/5); **Flow rate:** 1.0 mL/min; **Detection:** UV 254 nm

**Racemic**

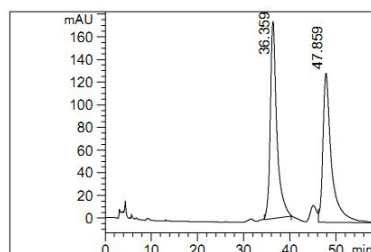

| Peak # | RT [min] | Area % | Area    |
|--------|----------|--------|---------|
| 1      | 36.359   | 50.127 | 1.718e4 |
| 2      | 47.859   | 49.873 | 1.709e4 |

**Chiral**

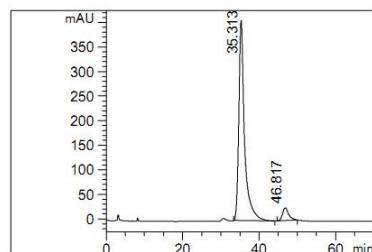

| Peak # | RT [min] | Area % | Area    |
|--------|----------|--------|---------|
| 1      | 35.313   | 93.631 | 4.260e4 |
| 2      | 46.817   | 6.369  | 2.898e3 |

**Table 2, entry 15**

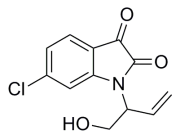

**HPLC Conditions:** **Column:** Chiralpak OD-H, Daicel Chemical Industries, Ltd., **Eluent:** Hexanes/IPA (95/5); **Flow rate:** 1.0 mL/min; **Detection:** UV 254 nm

**Racemic**

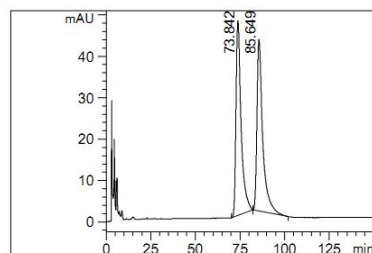

| Peak # | RT [min] | Area % | Area    |
|--------|----------|--------|---------|
| 1      | 73.842   | 50.179 | 9.348e3 |
| 2      | 85.649   | 49.821 | 9.281e3 |

**Chiral**

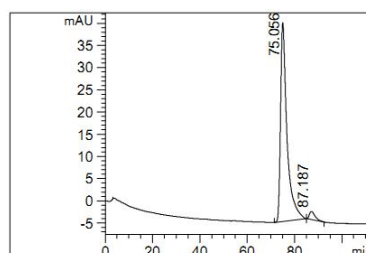

| Peak # | RT [min] | Area % | Area    |
|--------|----------|--------|---------|
| 1      | 75.056   | 96.400 | 8.440e3 |
| 2      | 87.187   | 3.600  | 315.207 |

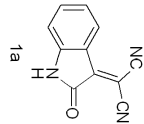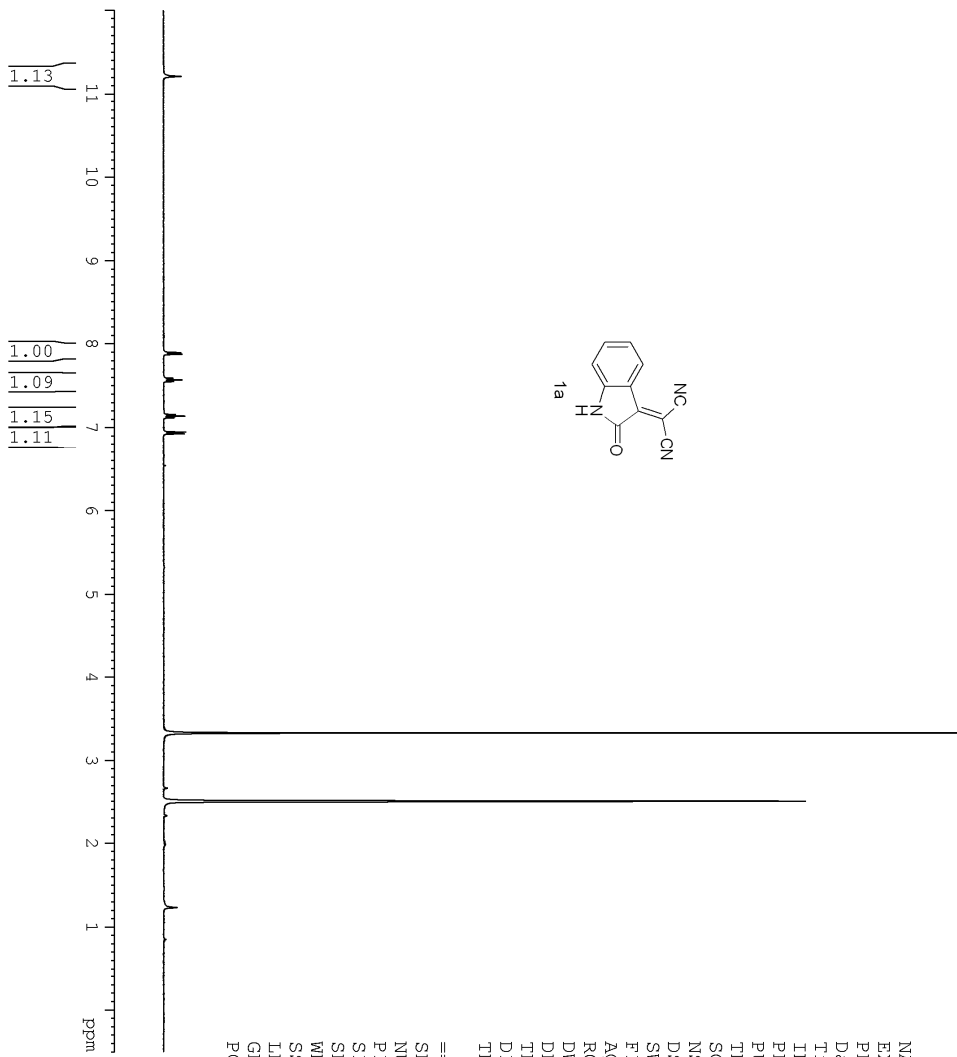

```

NAME LG-xin
EXPNO 85
PROCNO 1
Date_ 20140513
Time 2.55
INSTRUM spect
PROBHD 5 mm PADUL 13C
PULPROG zg30
TD 32768
SOLVENT DMSO
NS 9
DS 0
SWH 12019.230 Hz
FIDRES 0.366798 Hz
AQ 1.3631988 sec
RG 203
DW 41.600 usec
DE 6.50 usec
TE 300.0 K
D1 2.0000000 sec
TD0 1

===== CHANNEL f1 =====
SFO1 400.1320007 MHz
NUC1 1H
P1 12.60 usec
SI 65535
SF 400.1300033 MHz
WDW EM
SSB 0
LB 0.50 Hz
GB 0
PC 1.00

```

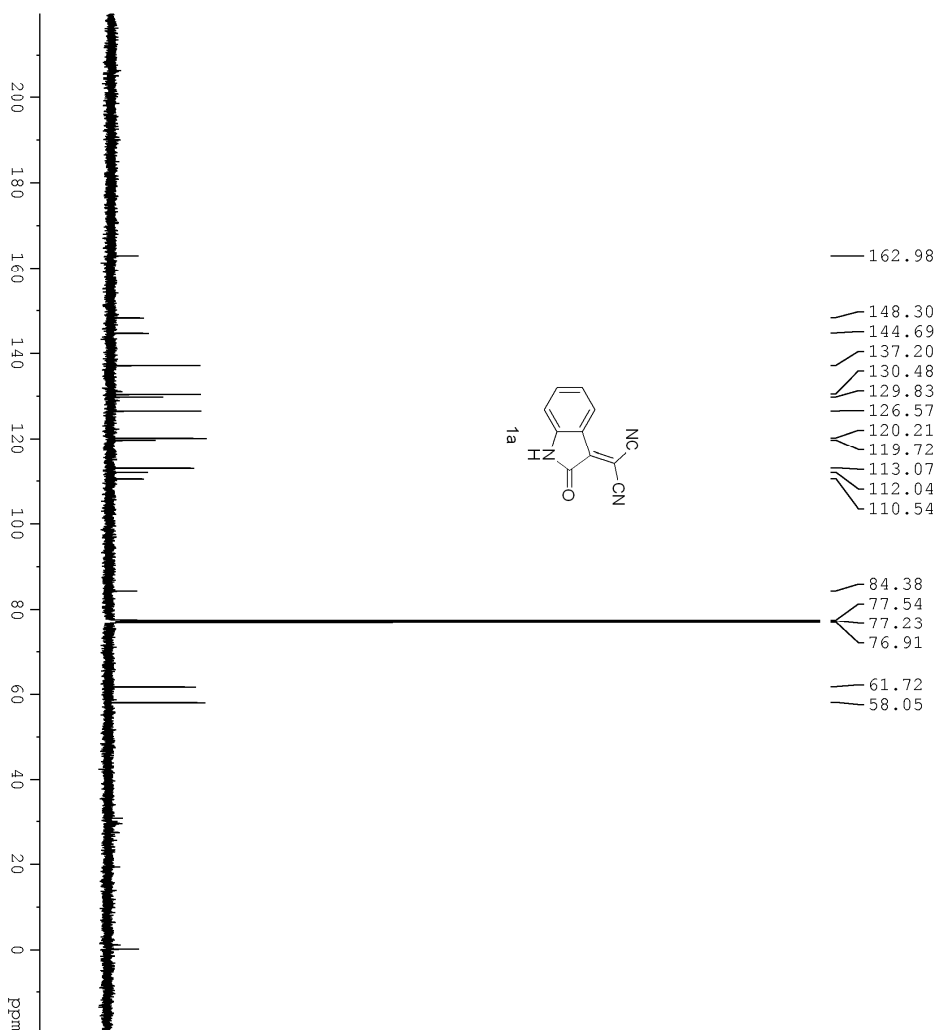

```

NAME LG-xin
EXPNO 65
PROCNO 1
Date_ 20140508
Time 3.03
INSTRUM spect
PROBHD 5 mm PADD1
PULPROG zgpg30
TD 65536
SOLVENT CDCl3
NS 802
DS 4
SWH 24038.461 Hz
FIDRES 0.366798 Hz
AQ 1.3631988 sec
RG 203
DW 20.800 usec
DE 6.50 usec
TE 300.0 K
D1 2.00000000 sec
D11 0.03000000 sec
TD0 1

===== CHANNEL f1 =====
SF01 100.6228293 MHz
NUC1 13C
P1 9.40 usec
S1 32768
SF 100.6127493 MHz
WDW EM
SSB 0
LB 1.00 Hz
GB 0
PC 1.40

```

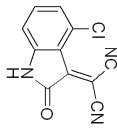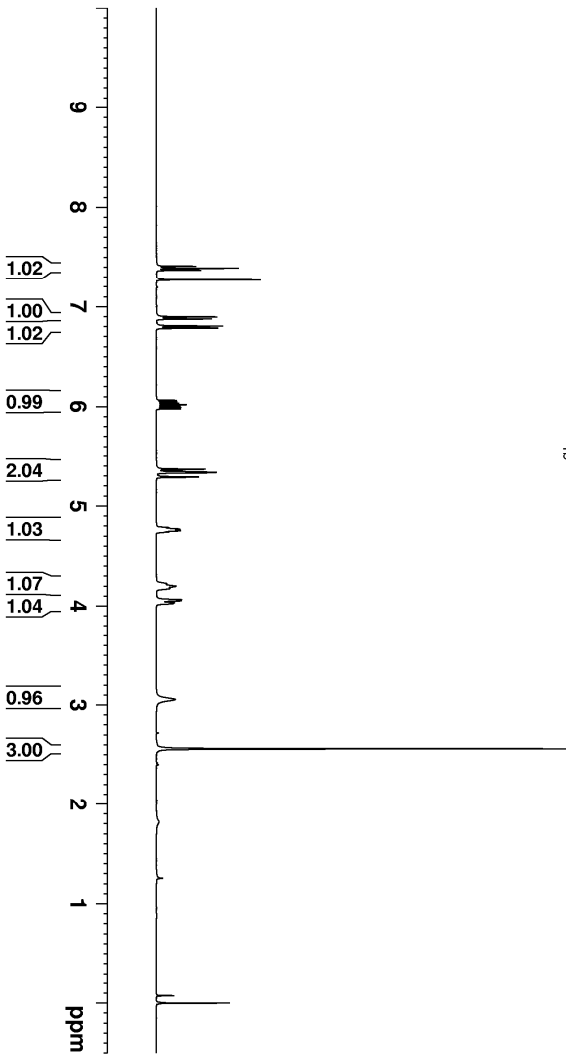

```

NAME          LG-xin
EXPNO         54
PROCNO        1
Date_         20140416
Time         7.48
INSTRUM       spect
PROBHD        5 mm PABD113C
PULPROG       zg30
TD            32768
SOLVENT       CDCl3
NS            6
DS            0
SWH           12019.230 Hz
FIDRES        0.366798 Hz
AQ            1.3631988 sec
RG            101
DE            41.600 usec
TE            300.0 K
D1            2.00000000 sec
TD0           1

===== CHANNEL f1 =====
SFO1          400.1320007 MHz
NUC1          1H
P1            12.60 usec
SI            65536
SF            400.1300043 MHz
WDW           EM
SSB           0
LB            0.50 Hz
GB            0
PC            1.00
  
```



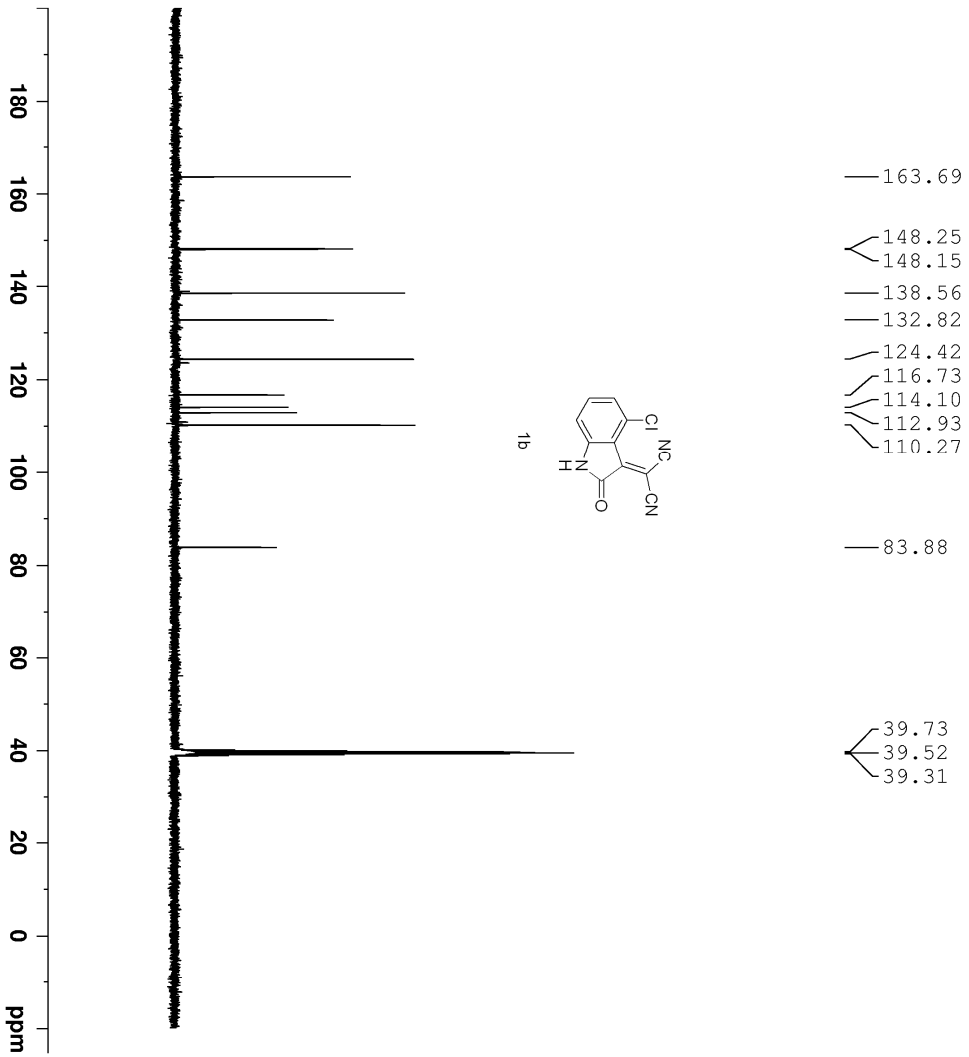

```

NAME 1gx
EXPNO 97
PROCNO 1
Date_ 20141210
Time 23.34
INSTRUM spect
PROBHD 5 mm P4DUL 13C
PULPROG zgpg30
TD 65536
SOLVENT DMSO
NS 62
DS 4
SWH 24038.461 Hz
FIDRES 0.366798 Hz
AQ 1.3631988 sec
RG 203
DW 20.800 usec
DE 6.50 usec
TE 300.0 K
D1 2.00000000 sec
D11 0.03000000 sec
TD0 1

===== CHANNEL f1 =====
SFO1 100.6228293 MHz
NUC1 13C
P1 9.40 usec
SI 32768
SF 100.6128116 MHz
WDW EM
SSB 0
LB 1.00 Hz
GB 0
PC 1.40

```

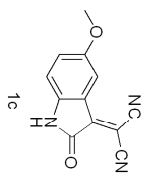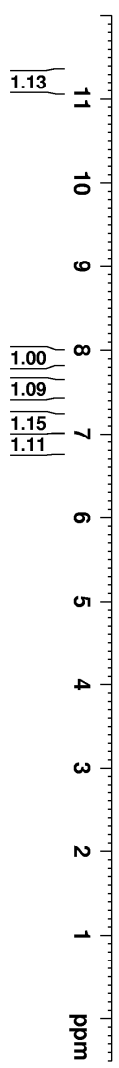

```

NAME          LG-xin
EXPNO         86
PROCNO       1
Date_        20140516
Time         2.56
INSTRUM      spect
PROBHD       5 mm PABD113C
PULPROG      zg30
TD           32768
SOLVENT      DMSO
NS           9
DS           0
SWH          12019.230 Hz
FIDRES       0.366798 Hz
AQ           1.3631988 sec
RG           203
DW           41.600 usec
DE           6.50 usec
TE           300.0 K
D1           2.00000000 sec
TD0          1

===== CHANNEL f1 =====
SFO1         400.1320007 MHz
NUC1         1H
P1           12.60 usec
SI           65536
SF           400.1300033 MHz
WDW          EM
SSB          0
LB           0.50 Hz
GB           0
PC           1.00

```

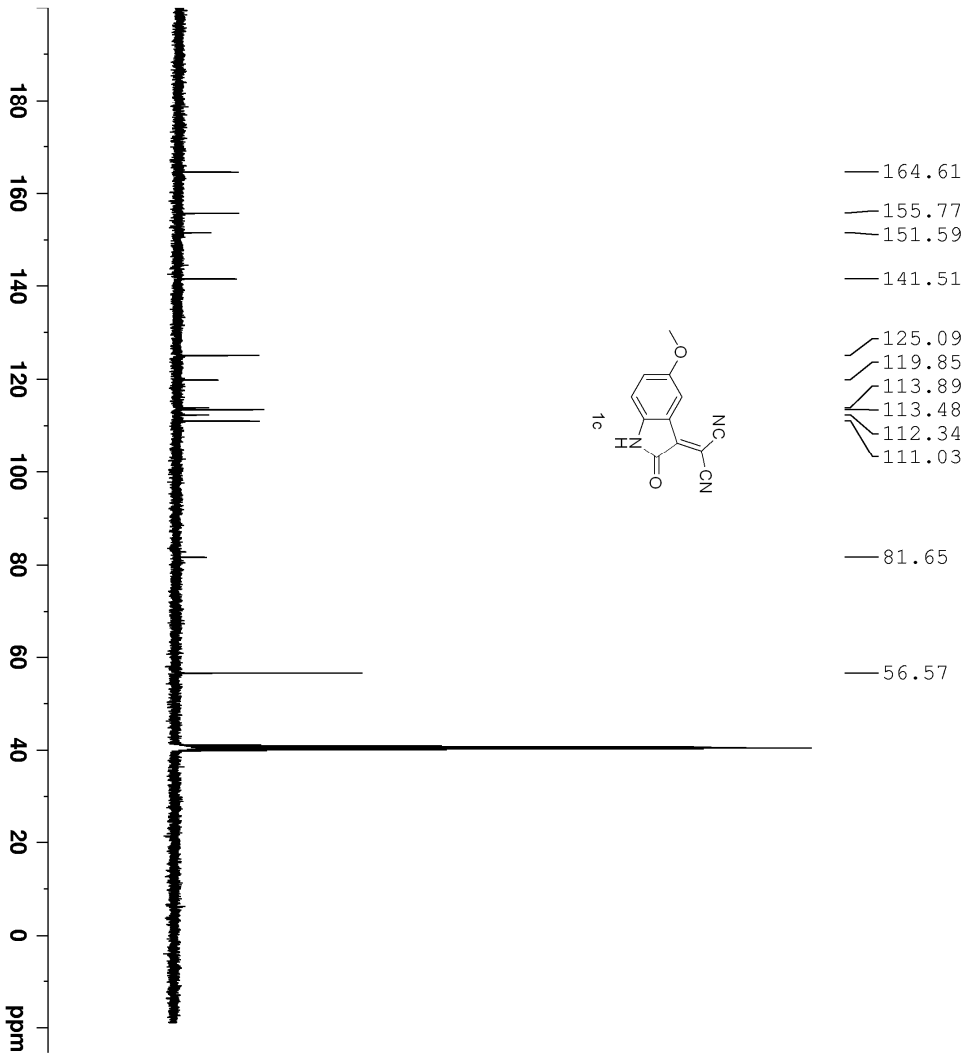

```

NAME          IG-x1d
EXPNO         85
PROCNO        1
Date_         20140514
Time          3.03
INSTRUM       spect
PROBHD        5 mm PABUL
PULPROG       zpg30
TD            65536
SOLVENT       DMSO
NS            96
DS            4
SWH           24038.461 Hz
FIDRES        0.366798 Hz
AQ            1.3631988 sec
RG            203
DM            20.800 usec
DE            6.50 usec
TE            300.0 K
D1            2.00000000 sec
D11           0.030000000 sec
TD0           1

===== CHANNEL f1 =====
SFO1          100.6228293 MHz
NUC1          13C
P1            9.40 usec
SI            32768
SF            100.6127196 MHz
WDW           EM
SSB           0
LB            1.00 Hz
GB            0
PC            1.40

```

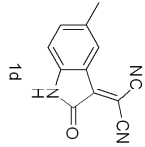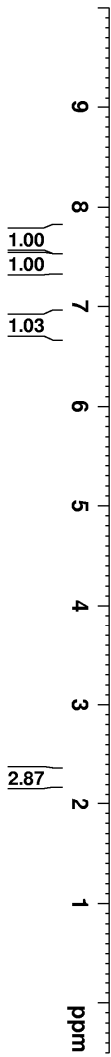

```

NAME          LG-xin
EXPNO         75
PROCNO       1
Date_        20140511
Time         6.21
INSTRUM      spect
PROBHD       5 mm PABDTL 13C
PULPROG      zg30
TD           32768
SOLVENT      DMSO
NS           6
DS           0
SWH          12019.230 Hz
FIDRES      0.366798 Hz
AQ          1.3631988 sec
RG          203
DW          41.600 usec
DE          6.50 usec
TE          300.0 K
D1          2.00000000 sec
TD0         1

===== CHANNEL f1 =====
SFO1         400.1320007 MHz
NUC1         1H
P1          12.60 usec
SI          65536
SF          400.1300032 MHz
WDW         EM
SSB         0
LB          0.50 Hz
GB          0
PC          1.00
  
```

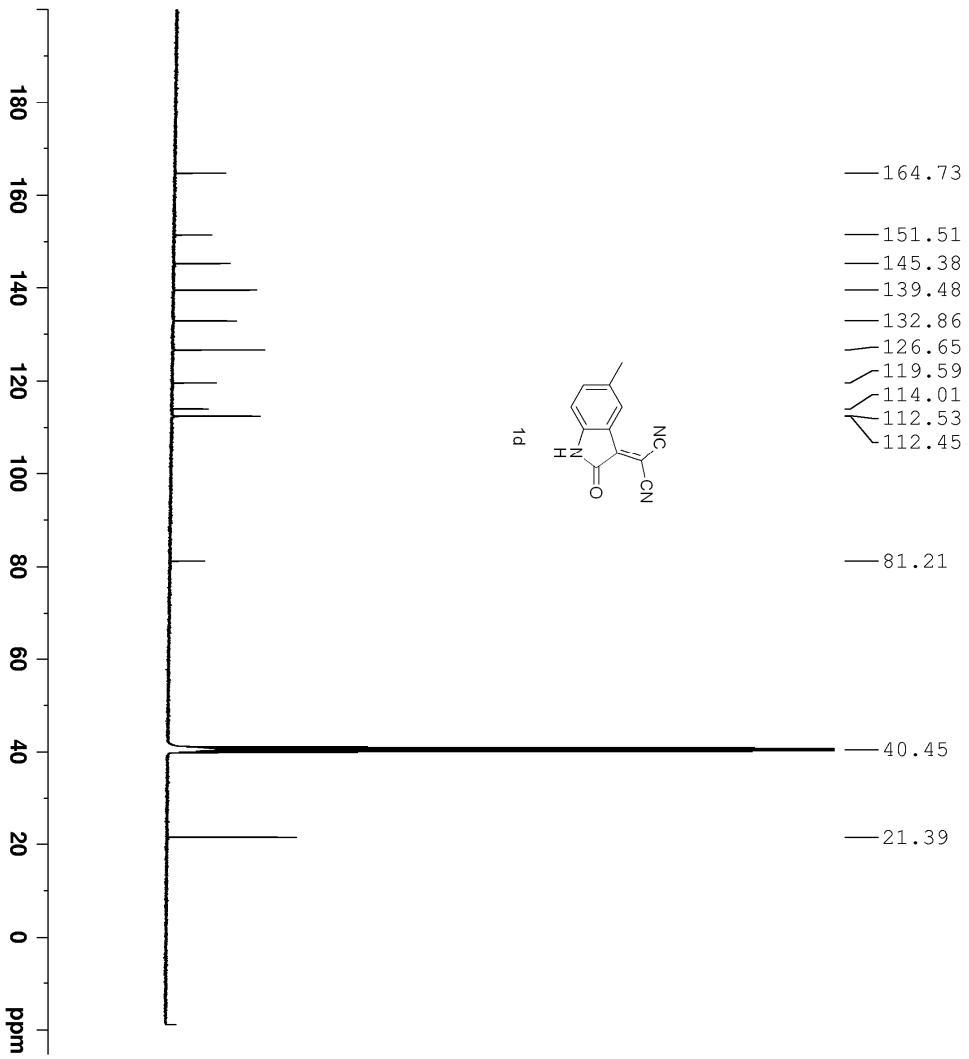

```

NAME 1gx
EXPNO 76
PROCNO 1
Date_ 20140514
Time 23.15
INSTRUM spect
PROBHD 5 mm P4DUL 13C
PULPROG zgpg30
TD 65536
SOLVENT DMSO
NS 10563
DS 4
SWH 24038.461 Hz
FIDRES 0.366798 Hz
AQ 1.3631988 sec
RG 203
DE 20.800 usec
TE 300.0 K
D1 2.00000000 sec
D11 0.03000000 sec
ID0 1

===== CHANNEL f1 =====
SFO1 100.6228293 MHz
NUC1 13C
P1 9.40 usec
SI 32768
SF 100.6127211 MHz
WDW EM
SSB 0
LB 1.00 Hz
GB 0
PC 1.40

```

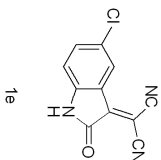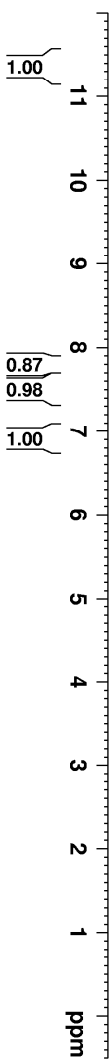

```

NAME          LG-xin
EXPNO         72
PROCNO       1
Date_        20140511
Time         5.53
INSTRUM      spect
PROBHD       5 mm PABD113C
PULPROG      zg30
TD           32768
SOLVENT      DMSO
NS           9
DS           0
SWH          12019.230 Hz
FIDRES       0.366798 Hz
AQ           1.3631988 sec
RG           203
DW           41.600 usec
DE           6.50 usec
TE           300.0 K
D1           2.00000000 sec
TD0          1

===== CHANNEL f1 =====
SFO1         400.1320007 MHz
NUC1         1H
P1           12.60 usec
SI           65536
SF           400.1300032 MHz
WDW          EM
SSB          0
LB           0.50 Hz
GB           0
PC           1.00
  
```

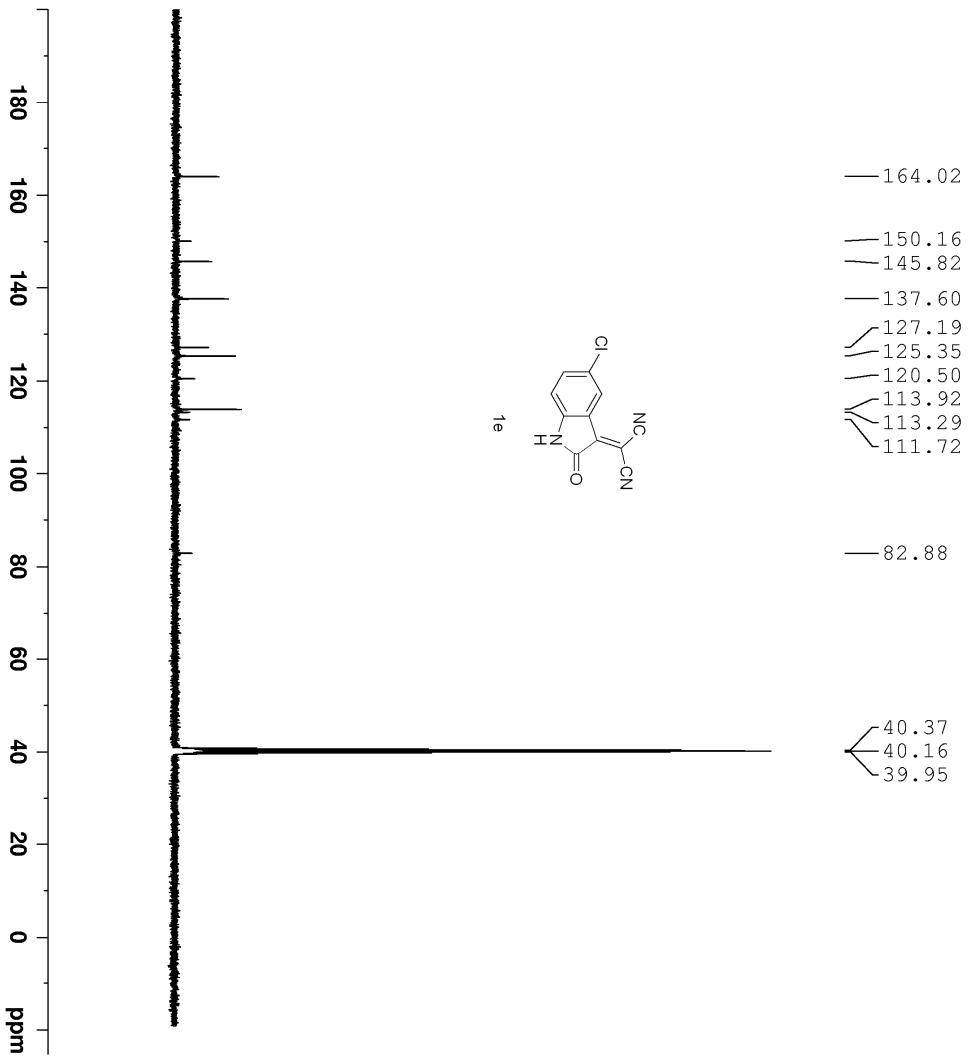

```

NAME 1gx
EXPNO 96
PROCNO 1
Date_ 20141210
Time 9.12
INSTRUM spect
PROBHD 5 mm P4DUL 13C
PULPROG zgpg30
TD 65536
SOLVENT DMSO
NS 288
DS 4
SWH 24038.461 Hz
FIDRES 0.366798 Hz
AQ 1.3631988 sec
RG 203
DW 20.800 usec
DE 6.50 usec
TE 300.0 K
D1 2.00000000 sec
D11 0.03000000 sec
TD0 1

===== CHANNEL f1 =====
SFO1 100.6228293 MHz
NUC1 13C
P1 9.40 usec
SI 32768
SF 100.6127507 MHz
WDW EM
SSB 0
LB 1.00 Hz
GB 0
PC 1.40

```

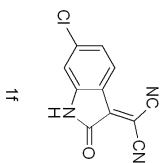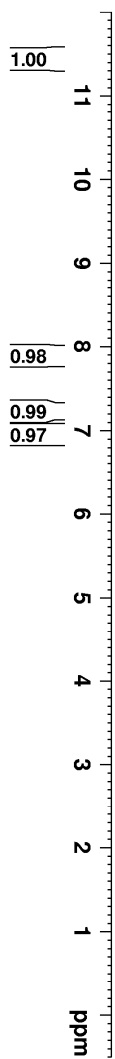

```

NAME          LG-xin
EXPNO         73
PROCNO       1
Date_        20140511
Time         6.03
INSTRUM      spect
PROBHD       5 mm PABD113C
PULPROG      zg30
TD           32768
SOLVENT      DMSO
NS           5
DS           0
SWH          12019.230 Hz
FIDRES       0.366798 Hz
AQ           1.3631988 sec
RG           203
DW           41.600 usec
DE           6.50 usec
TE           300.0 K
D1           2.00000000 sec
TD0          1

===== CHANNEL f1 =====
SFO1         400.1320007 MHz
NUC1         1H
P1           12.60 usec
SI           65536
SF           400.1300032 MHz
WDW          EM
SSB          0
LB           0.50 Hz
GB           0
PC           1.00
  
```



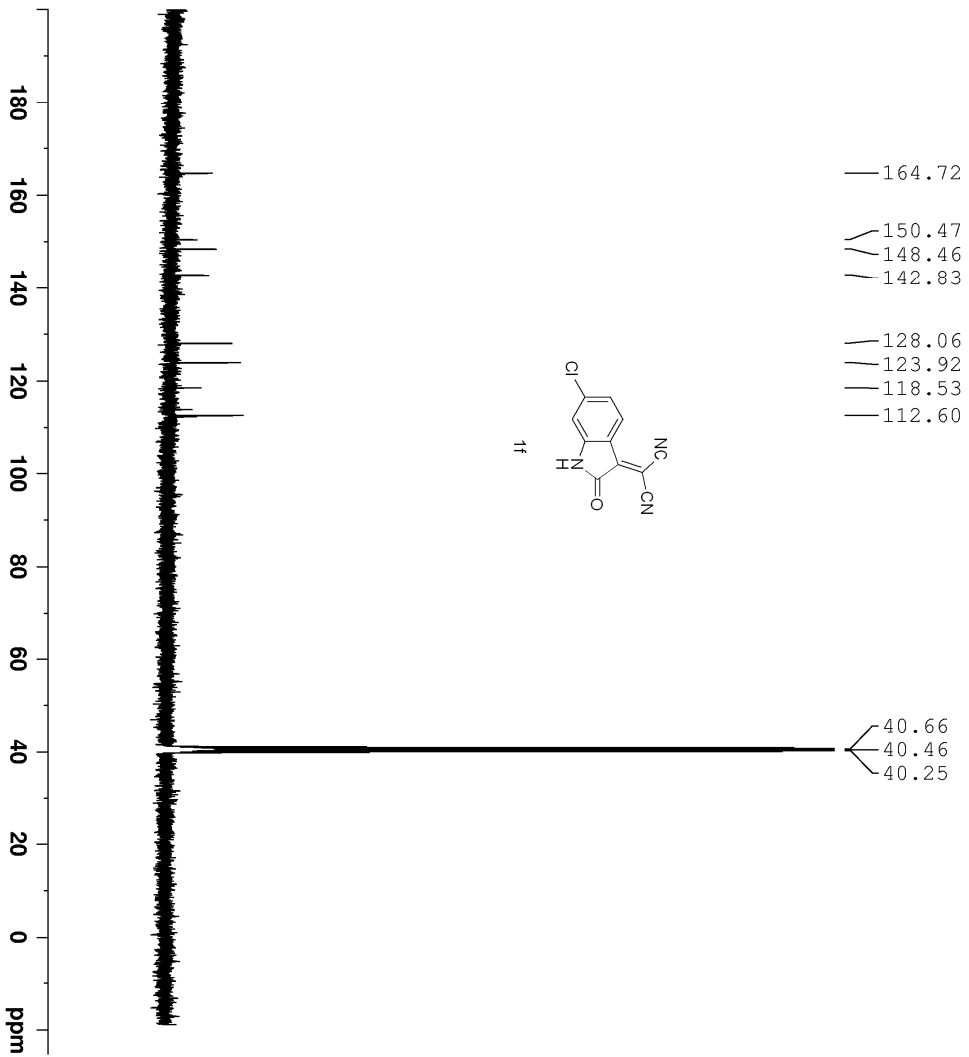

```

NAME LG-x.in
EXPNO 74
PROCNO 1
Date_ 20140511
Time 6.04
INSTRUM spect
PROBHD 5 mm P4DUL 13C
PULPROG zgpg30
TD 65536
SOLVENT DMSO
NS 254
DS 4
SWH 24038.461 Hz
FIDRES 0.366798 Hz
AQ 1.3631988 sec
RG 203
DE 20.800 usec
TE 300.0 K
D1 2.00000000 sec
D11 0.03000000 sec
TD0 1

===== CHANNEL f1 =====
SFO1 100.6228293 MHz
NUC1 13C
P1 9.40 usec
SI 32768
SF 100.6127209 MHz
WDW EM
SSB 0
LB 1.00 Hz
GB 0
PC 1.40

```

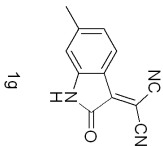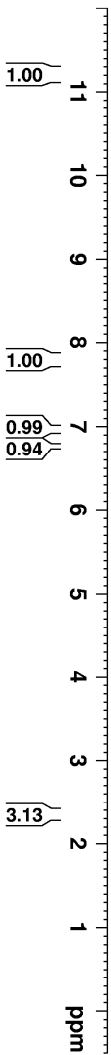

```

NAME          LG-xin
EXPNO         81
PROCNO       1
Date_        20140511
Time         6.54
INSTRUM      spect
PROBHD       5 mm PABDTL 13C
PULPROG      zg30
TD           32768
SOLVENT      DMSO
NS           4
DS           0
SWH          12019.230 Hz
FIDRES       0.366798 Hz
AQ           1.3631988 sec
RG           203
DW           41.600 usec
DE           6.50 usec
TE           300.0 K
D1           2.00000000 sec
TD0          1

===== CHANNEL f1 =====
SFO1         400.1320007 MHz
NUC1         1H
P1           12.60 usec
SI           65536
SF           400.1300032 MHz
WDW          EM
SSB          0
LB           0.50 Hz
GB           0
PC           1.00
  
```

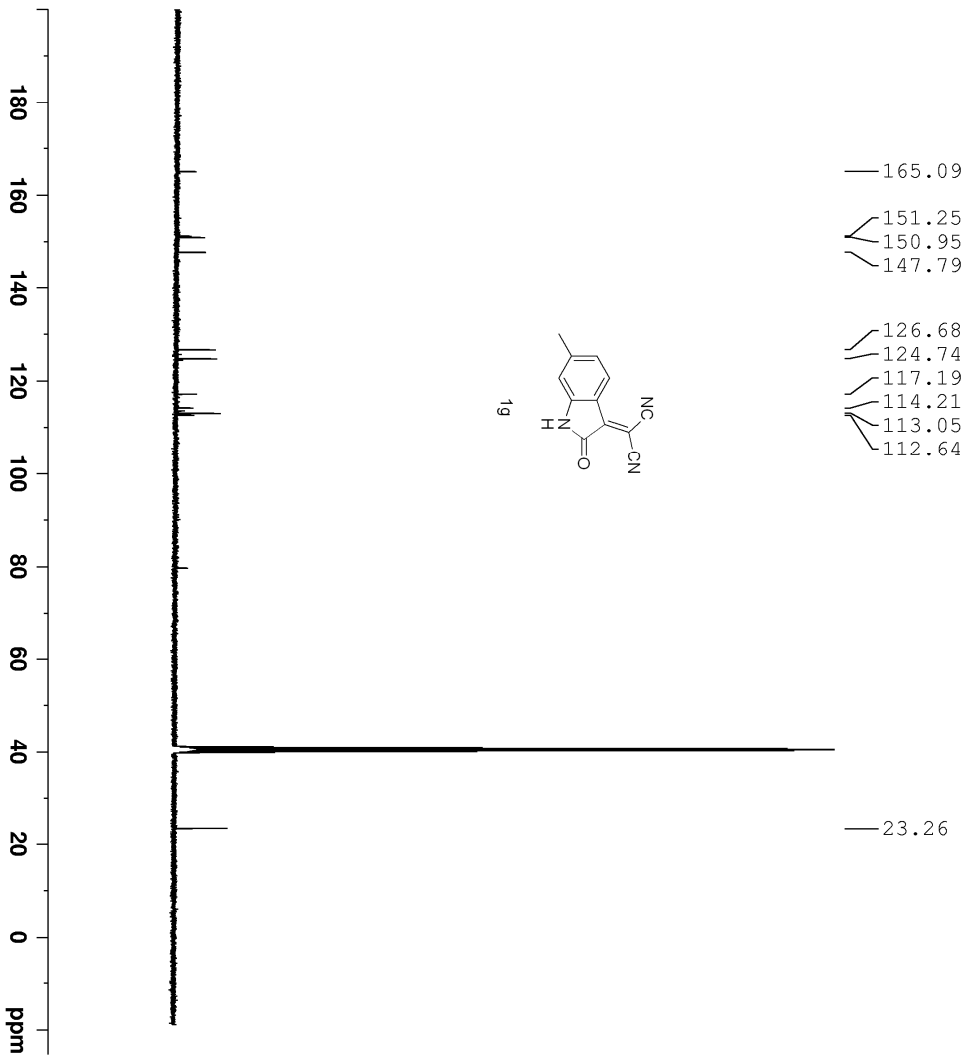

```

NAME 1gx
EXPNO 82
PROCNO 1
Date_ 20140513
Time 12.51
INSTRUM spect
PROBHD PULPROG 5 mm P4DUTL 13C
TD zppg30
F2 65536
SOLVENT DMSO
NS 700
DS 4
SWH 24038.461 Hz
FIDRES 0.366798 Hz
AQ 1.3631988 sec
RG 203
DE 20.800 usec
TE 300.0 K
D1 2.00000000 sec
D11 0.03000000 sec
TD0 1

===== CHANNEL f1 =====
SFO1 100.6228293 MHz
NUC1 13C
P1 9.40 usec
SI 32768
SF 100.6127216 MHz
WDW EM
SSB 0
LB 1.00 Hz
GB 0
PC 1.40

```

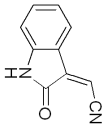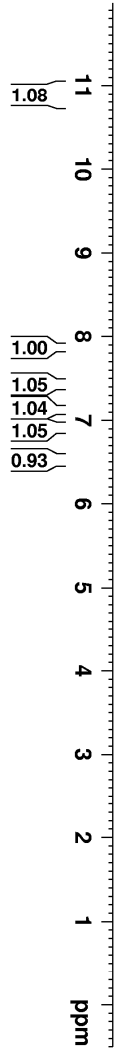

```

NAME          LG-xin
EXPNO         79
PROCNO       1
Date_        20140511
Time         6.42
INSTRUM      spect
PROBHD       5 mm PABD113C
PULPROG      zg30
TD           32768
SOLVENT      DMSO
NS           3
DS           0
SWH          12019.230 Hz
FIDRES      0.366798 Hz
AQ          1.3631988 sec
RG          203
DW          41.600 usec
DE          6.50 usec
TE          300.0 K
D1          2.00000000 sec
TD0         1

===== CHANNEL f1 =====
SFO1         400.1320007 MHz
NUC1         1H
P1          12.60 usec
SI          65536
SF          400.1300032 MHz
WDW         EM
SSB         0
LB          0.50 Hz
GB          0
PC          1.00
  
```

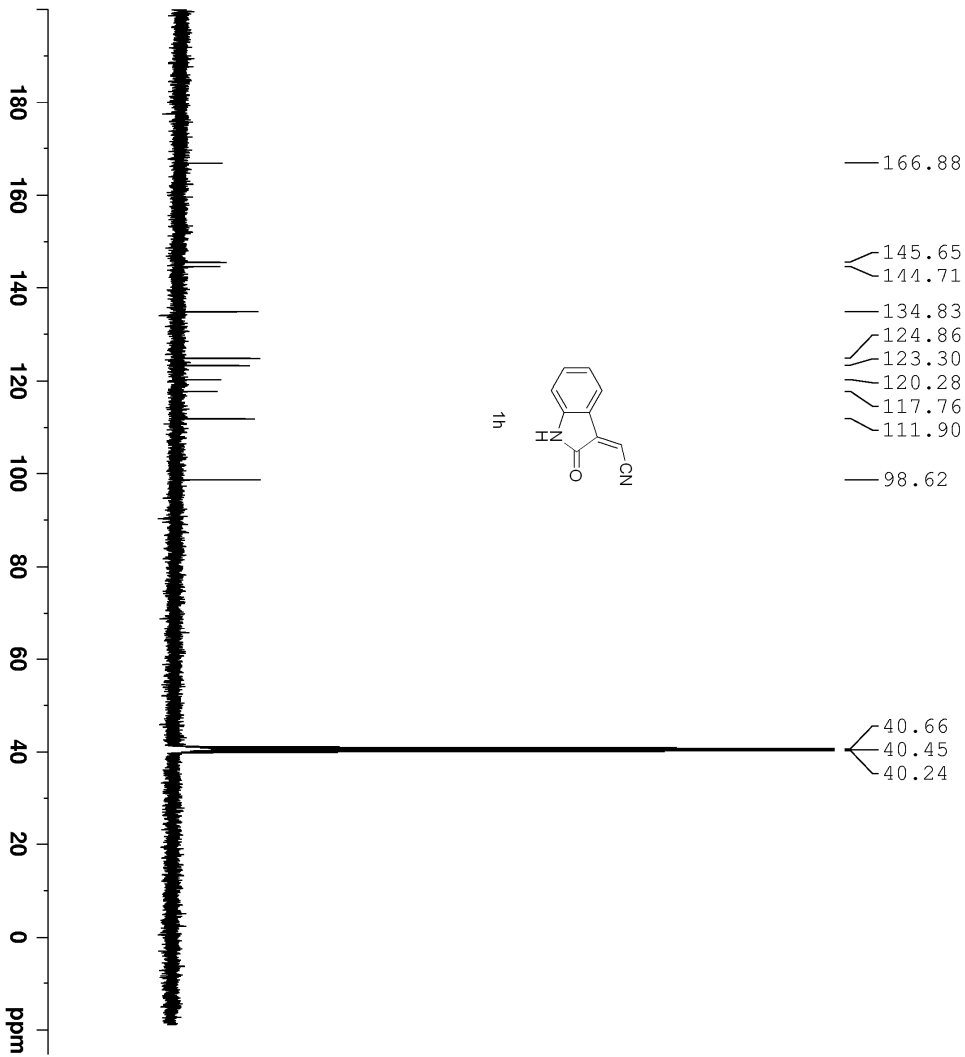

```

NAME LG-x-in
EXPNO 80
PROCNO 1
Date_ 20140511
Time 6.44
INSTRUM spect
PROBHD 5 mm PADUL 13C
PULPROG zgpg30
TD 65536
SOLVENT DMSO
NS 151
DS 4
SWH 24038.461 Hz
FIDRES 0.366798 Hz
AQ 1.3631988 sec
RG 203
DE 20.800 usec
TE 300.0 K
D1 2.00000000 sec
D11 0.03000000 sec
TD0 1

===== CHANNEL f1 =====
SFO1 100.6228293 MHz
NUC1 13C
P1 9.40 usec
SI 32768
SF 100.6127210 MHz
WDW EM
SSB 0
LB 1.00 Hz
GB 0
PC 1.40

```

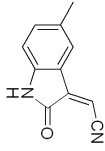

11

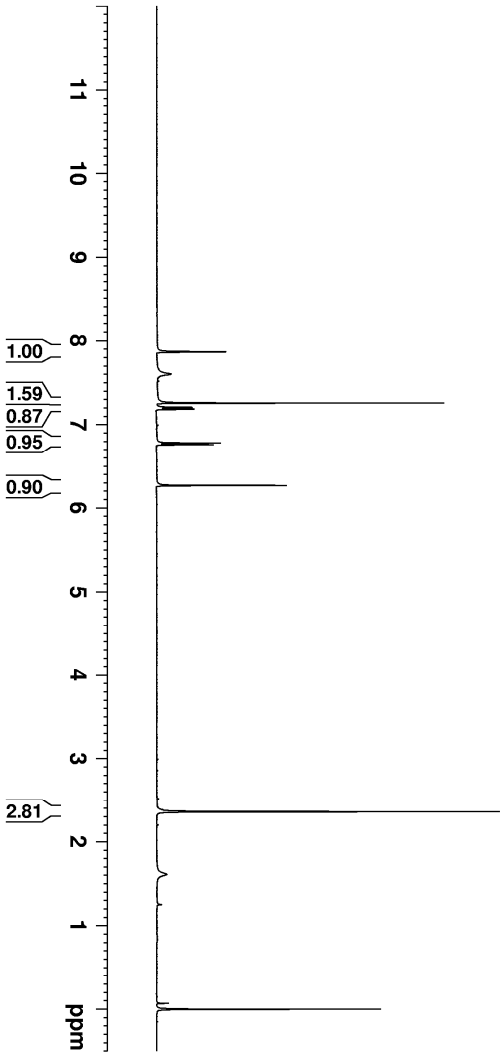

```

NAME          LG-xin
EXPNO         29
PROCNO       1
Date_        20140315
Time         3.05
INSTRUM      spect
PROBHD       5 mm PABD113C
PULPROG      zg30
TD           32768
SOLVENT      CDCl3
NS           16
DS           0
SWH          12019.230 Hz
FIDRES       0.366798 Hz
AQ           1.3631988 sec
RG           203
DW           41.600 usec
DE           6.50 usec
TE           300.0 K
D1           2.00000000 sec
TD0          1

===== CHANNEL f1 =====
SFO1         400.1320007 MHz
NUC1         1H
P1           12.60 usec
SI           65536
SF           400.1300093 MHz
WDW          EM
SSB          0
LB           0.50 Hz
GB           0
PC           1.00
  
```

180 160 140 120 100 80 60 40 20 0 ppm

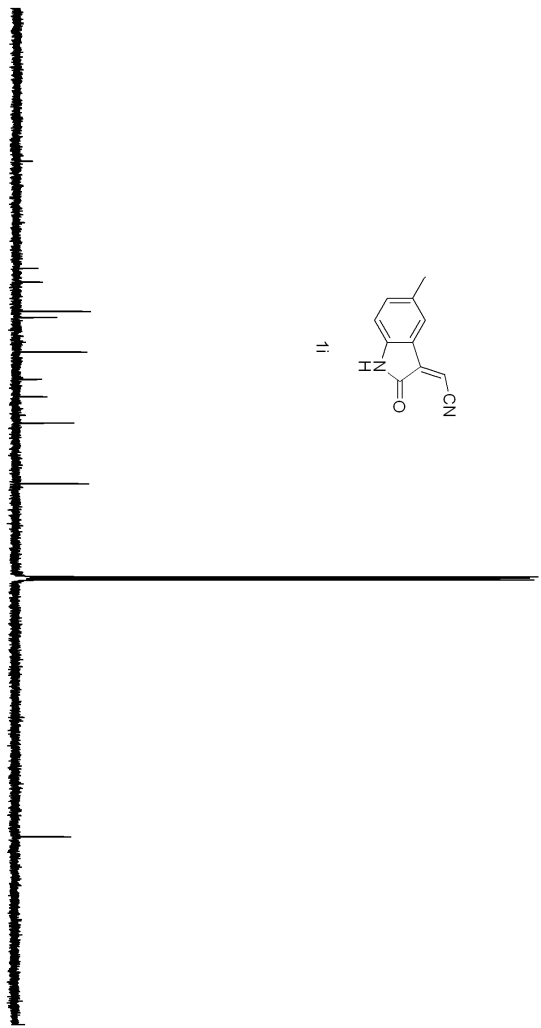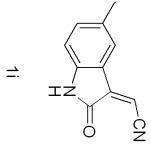

144.06  
140.91  
134.62  
133.31  
125.93  
120.05  
116.32  
110.69

97.49  
77.55  
77.23  
76.92

21.22

```

NAME LG-x:in
EXPNO 30
PROCNO 1
Date_ 20140319
Time 11.58
INSTRUM spect
PROBHD 5 mm PABUL 13C
PULPROG zgpg30
TD 65536
SOLVENT CDCl3
NS 665
DS 4
SWH 24038.461 Hz
FIDRES 0.366798 Hz
AQ 1.3631988 sec
RG 203
DE 20.800 usec
DW 6.50 usec
TE 300.0 K
D1 2.00000000 sec
D11 0.03000000 sec
TD0 1

===== CHANNEL f1 =====
SFO1 100.6228293 MHz
NUC1 13C
P1 9.40 usec
SI 32768
SF 100.6127485 MHz
WDW EM
SSB 0
LB 1.00 Hz
GB 0
PC 1.40
  
```

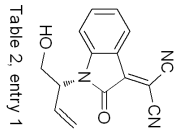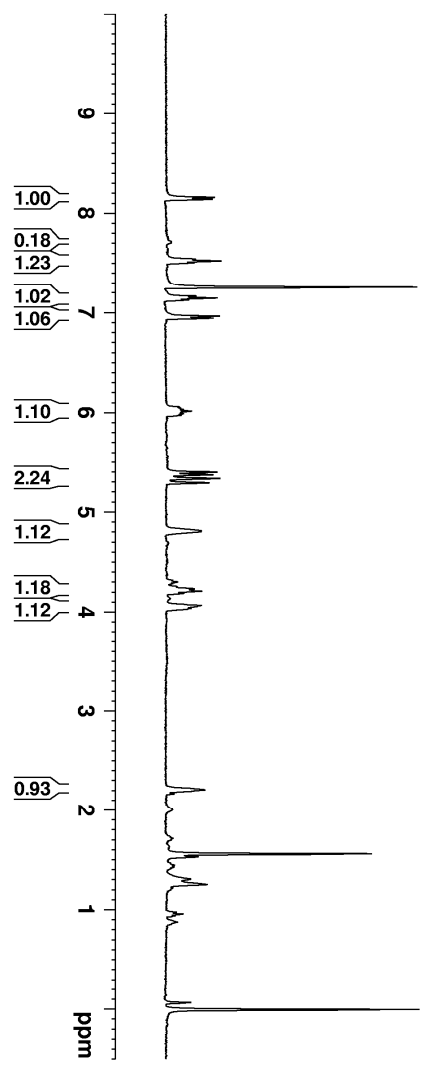

```

NAME LG
EXPNO 112
PROCNO 1
Date_ 20121103
Time 6.30
INSTRUM spect
PROBHD 5 mm PABDTL 13C
PULPROG zg30
TD 32768
SOLVENT CDCl3
NS 16
DS 0
SWH 12019.230 Hz
FIDRES 0.366798 Hz
AQ 1.3631988 sec
RG 203
DE 41.600 usec
TE 300.0 K
D1 2.00000000 sec
TD0 1

===== CHANNEL f1 =====
NUC1 1H
P1 12.60 usec
SI 65536
SF 400.1300187 MHz
WDW EM
SSB 0
LB 0.50 Hz
GB 0
PC 1.00

```



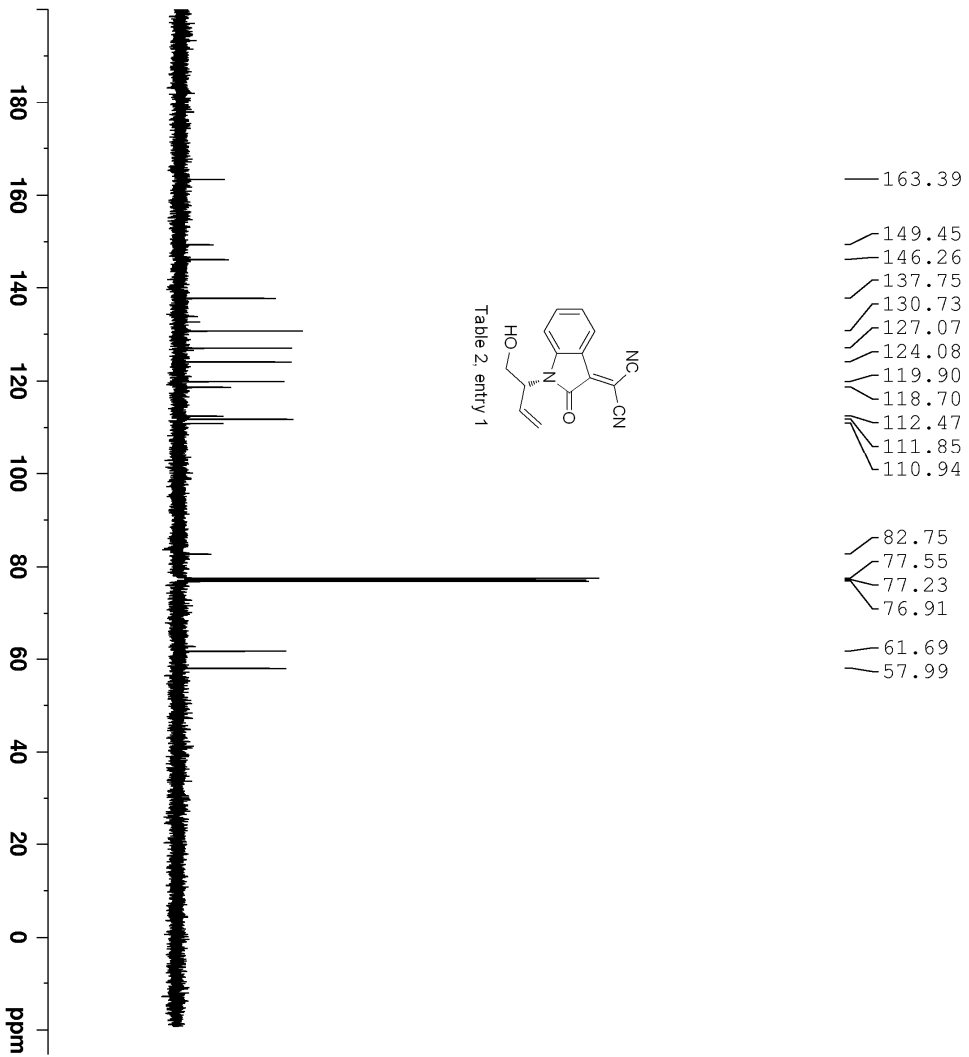

```

NAME          LG-x-in
EXPNO         63
PROCNO        1
Date_         20140508
Time         1.58
INSTRUM       5 mm PADU1
PROBHD        spect
PULPROG       zpgg30
TD            65536
SOLVENT       CDCl3
NS            75
DS            4
SWH           24038.461 Hz
FIDRES        0.366798 Hz
AQ            1.3631988 sec
RG            203
DE            20.800 usec
TE            300.0 K
D1            2.00000000 sec
D11           0.03000000 sec
TD0           1

===== CHANNEL f1 =====
SFO1          100.6228293 MHz
NUC1          13C
P1            9.40 usec
SI            32768
SF            100.6127521 MHz
WDW           EM
SSB           0
LB            1.00 Hz
GB            0
PC            1.40

```

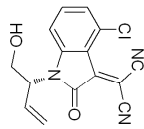

Table 2, entry 2

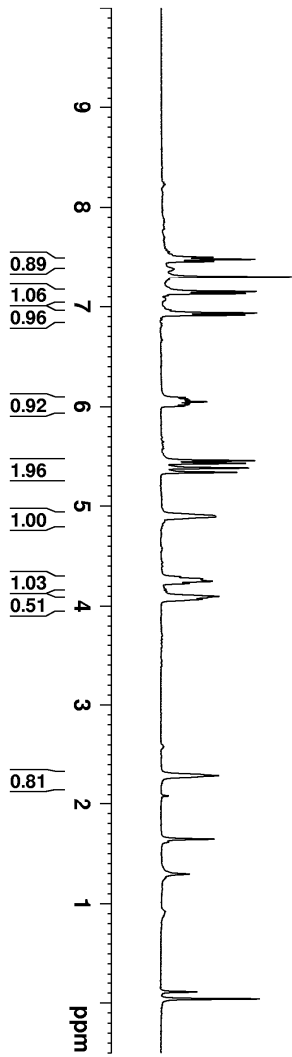

```

NAME LG
EXPNO 203
PROCNO 1
Date_ 20121129
Time 12.29
INSTRUM spect
PROBHD 5 mm PABDTL 13C
PULPROG zg30
TD 32768
SOLVENT CDCl3
NS 16
DS 0
SWH 12019.230 Hz
FIDRES 0.366798 Hz
AQ 1.3631988 sec
RG 203
DW 41.600 usec
DE 6.50 usec
TE 300.0 K
D1 2.00000000 sec
TD0 1

===== CHANNEL f1 =====
NUC1 1H
P1 12.60 usec
SI 65536
SF 400.1300000 MHz
WDW EM
SSB 0
LB 0.50 Hz
GB 0
PC 1.00

```

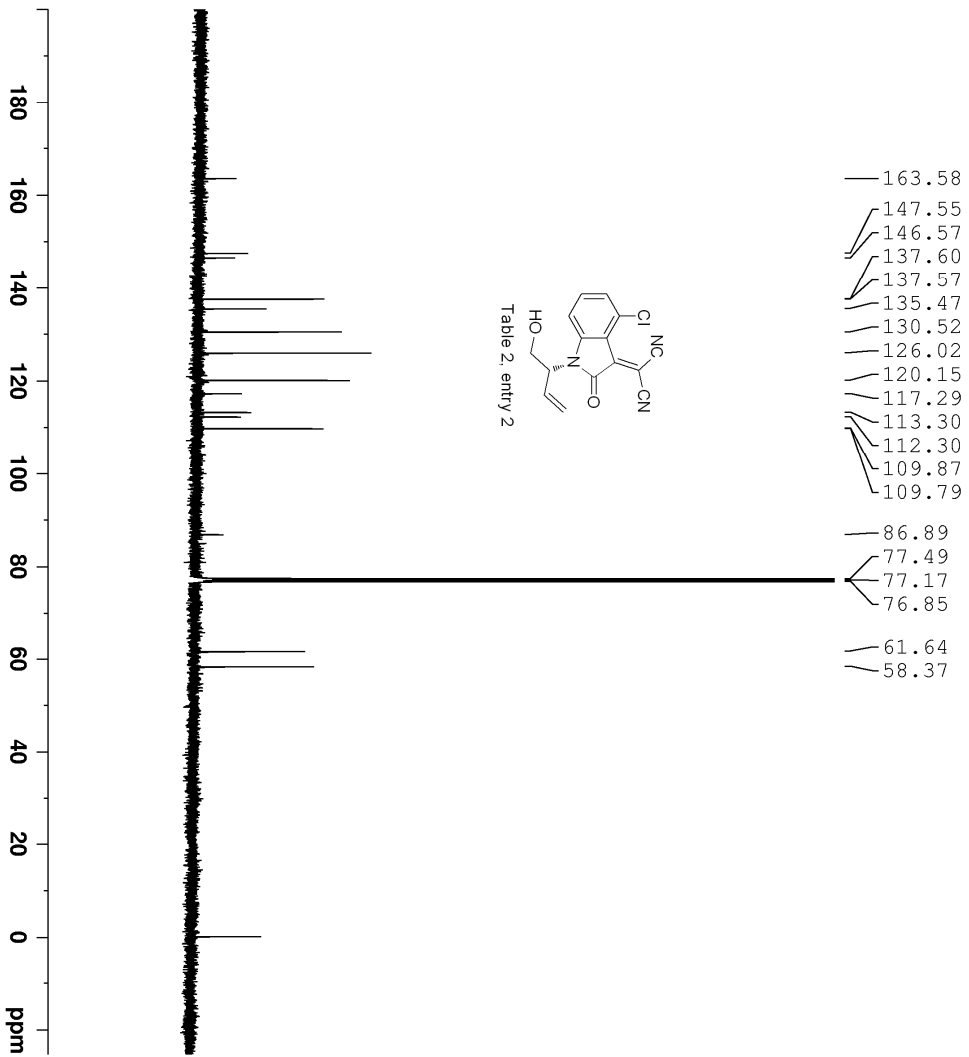

```

NAME          1G
EXPNO         199
PROCNO        1
Date_         20140508
Time         23.39
INSTRUM      spect
PROBHD       5 mm P4DUTL 13C
PULPROG      zgpg30
TD           32768
SOLVENT      CDCl3
NS           19245
DS           0
SWH          25252.525 Hz
FIDRES       0.770646 Hz
AQ           0.6488564 sec
RG           203
DE           19.800 usec
TE           300.0 K
D1           2.00000000 sec
D11          0.03000000 sec
TD0          1

===== CHANNEL f1 =====
NUC1         13C
P1           9.40 usec
SI           32768
SF          100.6127550 MHz
WDW          EM
SSB          0
LB           1.00 Hz
GB           0
PC           1.40

```

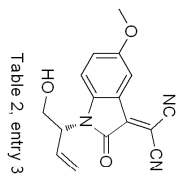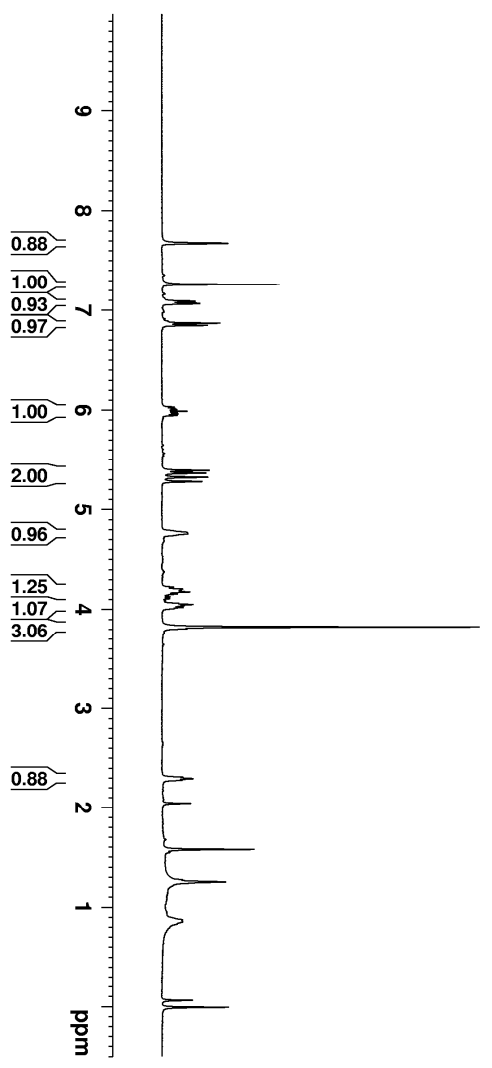

```

NAME LG
EXPNO 156
PROCNO 1
Date_ 20121116
Time 8.57
INSTRUM spect
PROBHD 5 mm PABD113C
PULPROG zg30
TD 32768
SOLVENT CDCl3
NS 16
DS 0
SWH 12019.230 Hz
FIDRES 0.366798 Hz
AQ 1.3631988 sec
RG 203
DW 41.600 usec
DE 6.50 usec
TE 300.0 K
D1 2.00000000 sec
TD0 1

===== CHANNEL f1 =====
NUC1 1H
P1 12.60 usec
SI 65536
SF 400.1300184 MHz
WDW EM
SSB 0
LB 0.50 Hz
GB 0
PC 1.00

```

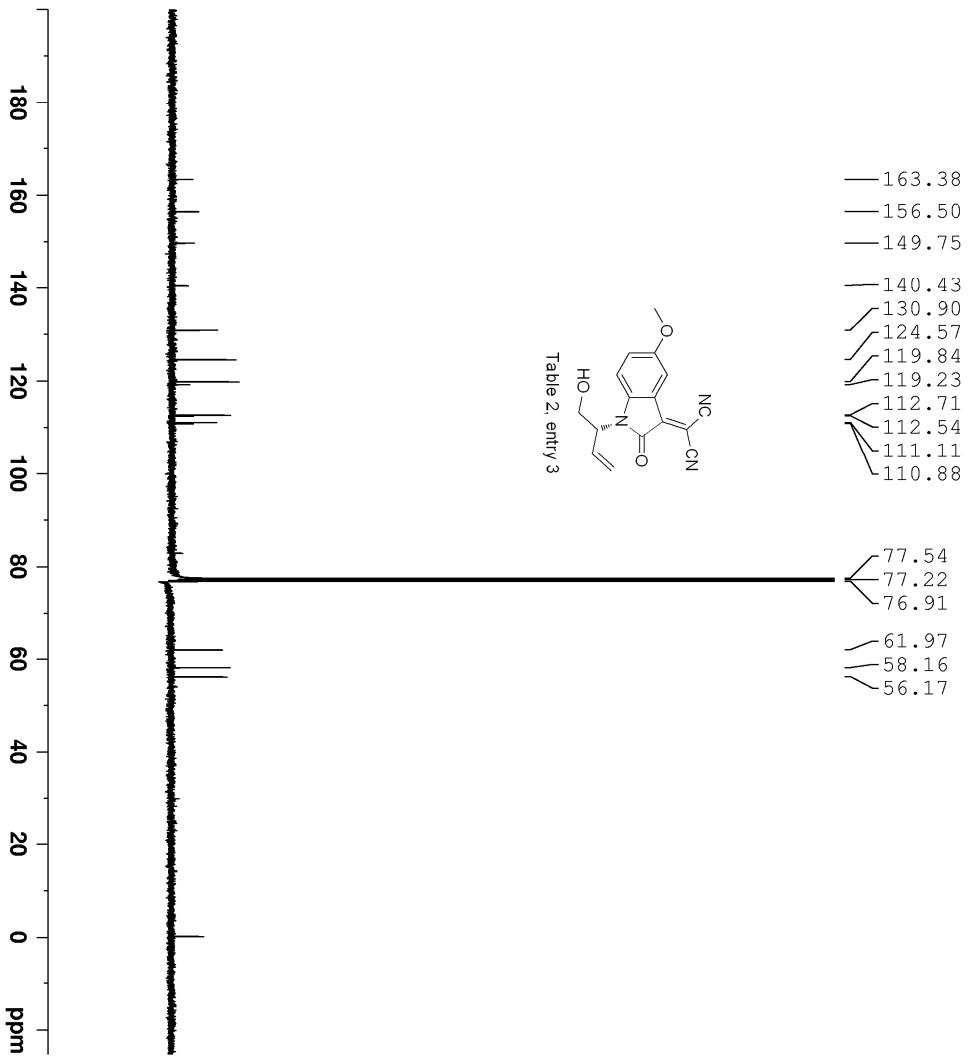

```

NAME          1G
EXPNO         157
PROCNO        1
Date_         20140510
Time         6.09
INSTRUM      5 mm P4DUTL
PROBHD       spect
PULPROG      zpgpg30
TD           32768
SOLVENT      CDCl3
NS           7072
DS           0
SWH          25252.525 Hz
FIDRES       0.770646 Hz
AQ           0.6488564 sec
RG           203
DE           19.800 usec
TE           300.0 K
D1           2.00000000 sec
D11          0.03000000 sec
TD0          1

===== CHANNEL f1 =====
NUC1         13C
P1           9.40 usec
SI           32768
SF          100.6127495 MHz
WDW          EM
SSB          0
LB           1.00 Hz
GB           0
PC           1.40

```

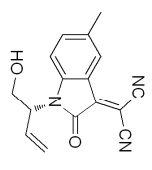

Table 2, entry 4

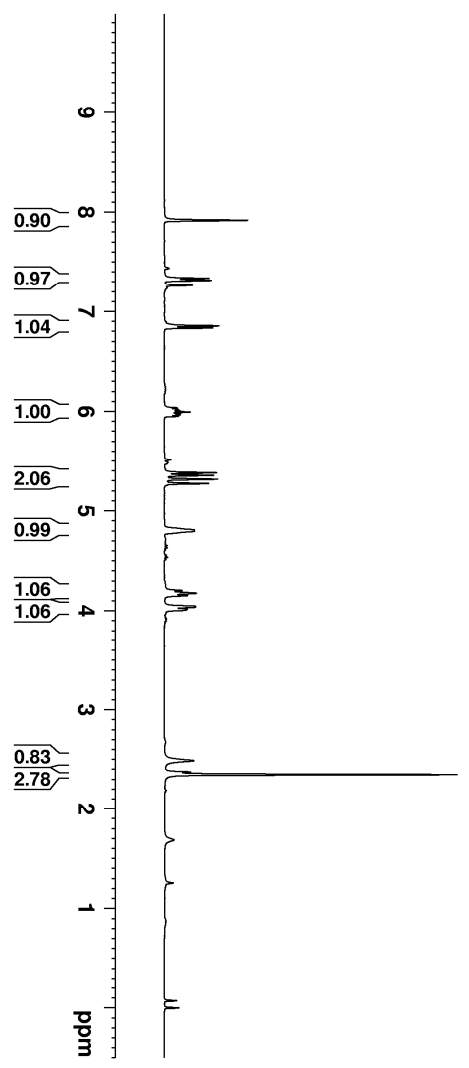

```

NAME          1gx
EXPNO         189
PROCNO        1
Date_         20121124
Time          9.27
INSTRUM       spect
PROBHD        5 mm PABD113C
PULPROG       zg30
TD            32768
SOLVENT       CDCl3
NS            16
DS            0
SWH           12019.230 Hz
FIDRES        0.366798 Hz
AQ            1.3631988 sec
RG            181
DW            41.600 usec
DE            6.50 usec
TE            300.0 K
D1            2.00000000 sec
TD0           1

===== CHANNEL f1 =====
NUC1          1H
P1            12.60 usec
SI            65536
SF            400.1300159 MHz
WDW           EM
SSB           0
LB            0.50 Hz
GB            0
PC            1.00

```

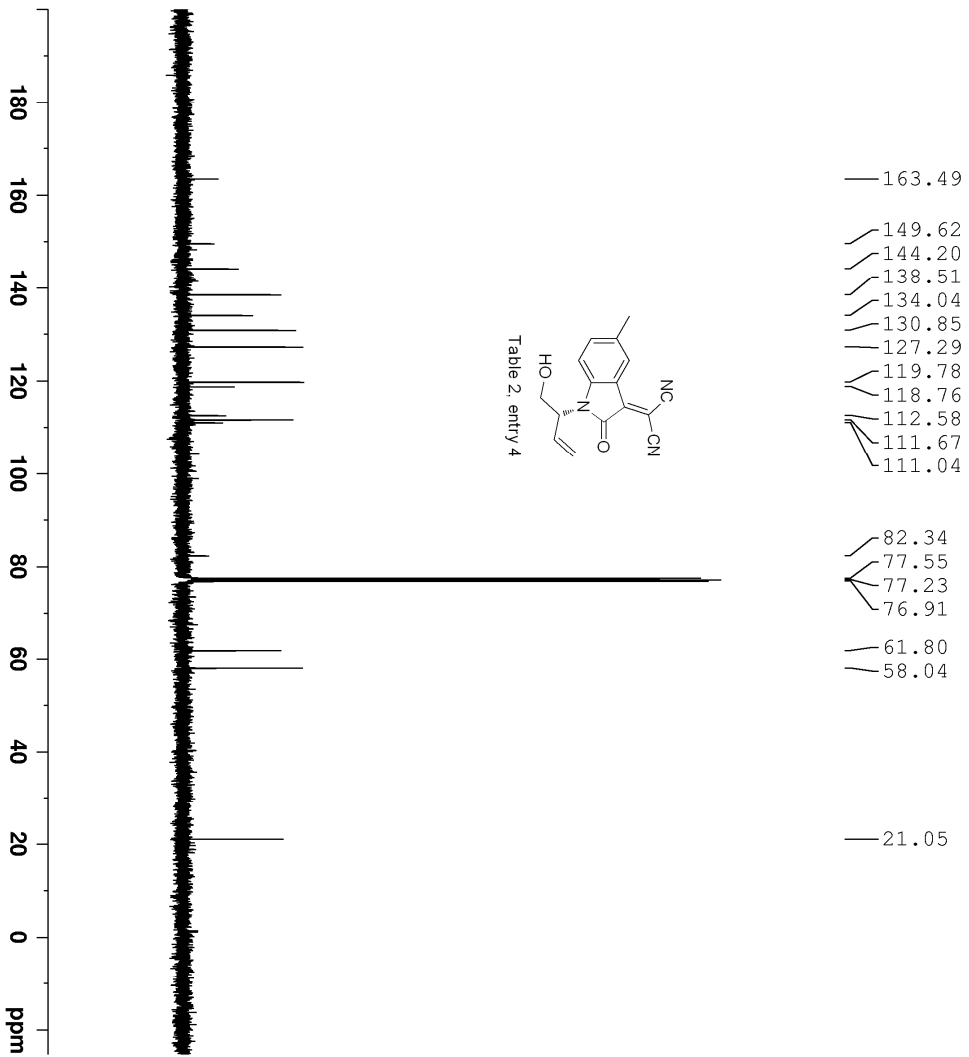

```

NAME          1G
EXPNO         190
PROCNO        1
Date_         20121124
Time         9.30
INSTRUM      5 mm P4DUTL 13C
PROBHD       zgpg30
PULPROG      32768
SOLVENT      CDCl3
NS           90
DS           0
SWH          25252.525 Hz
FIDRES       0.770646 Hz
AQ           0.6488564 sec
RG           203
DE           19.800 usec
TE           300.0 K
D1           2.00000000 sec
D11          0.03000000 sec
TD           1

===== CHANNEL f1 =====
NUC1         13C
P1           9.40 usec
SI           32768
SF          100.6127525 MHz
WDW          EM
SSB          0
LB           1.00 Hz
GB           0
PC           1.40

```

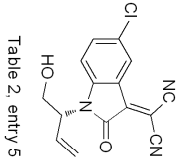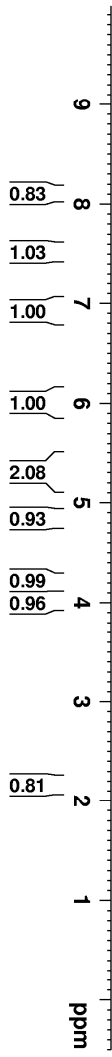

```

NAME          LG-xin
EXPNO         20
PROCNO       1
Date_        20140302
Time         6.13
INSTRUM      spect
PROBHD       5 mm PABD113C
PULPROG      zg30
TD           32768
SOLVENT      CDCl3
NS           16
DS           0
SWH          12019.230 Hz
FIDRES       0.366798 Hz
AQ           1.3631988 sec
RG           203
DW           41.600 usec
DE           6.50 usec
TE           300.0 K
D1           2.00000000 sec
TD0          1

===== CHANNEL f1 =====
SFO1         400.1320007 MHz
NUC1         1H
P1           12.60 usec
SI           65536
SF           400.1300070 MHz
WDW          EM
SSB          0
LB           0.50 Hz
GB           0
PC           1.00
  
```



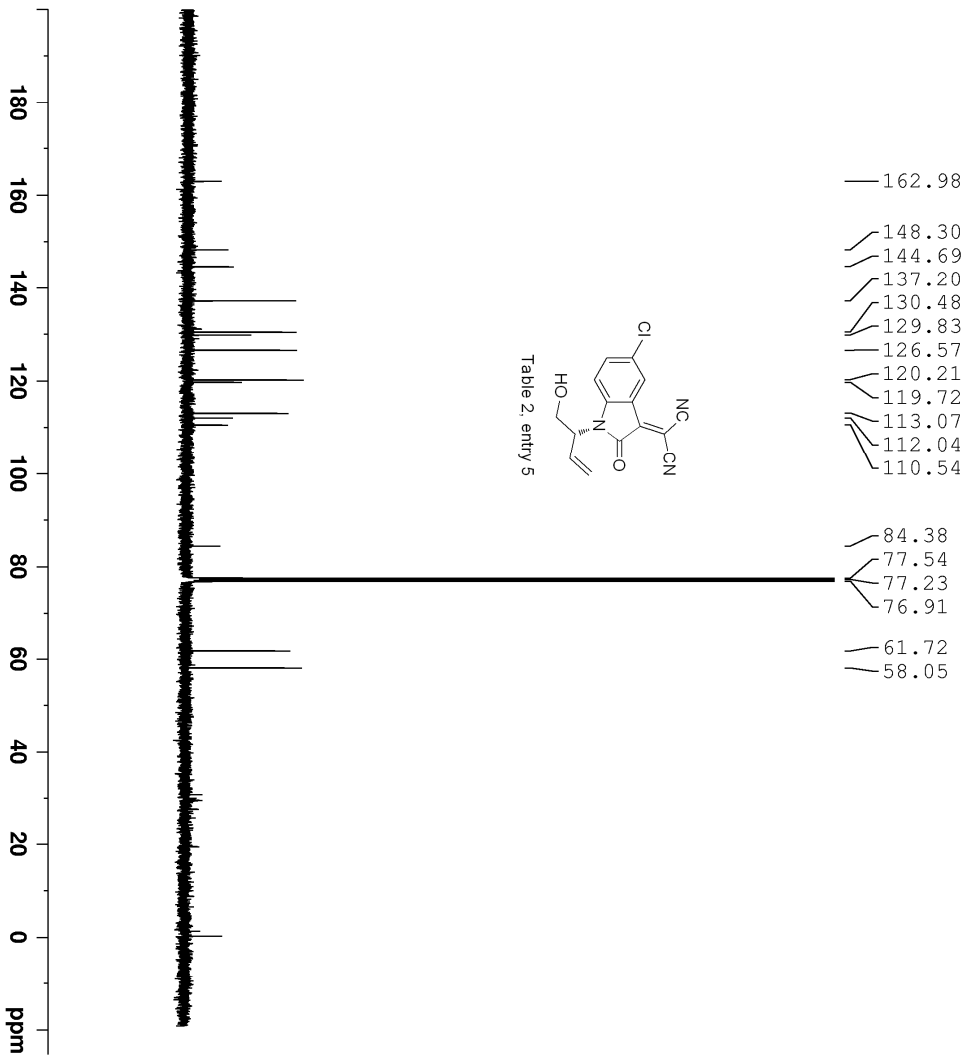

```

NAME LG-x-in
EXPNO 65
PROCNO 1
Date_ 20140508
Time 3.03
INSTRUM 5 mm PABUL 13C
PROBHD zgpg30
PULPROG 65536
SOLVENT CDCl3
NS 802
DS 4
SWH 24038.461 Hz
FIDRES 0.366798 Hz
AQ 1.3631988 sec
RG 203
DW 20.800 usec
DE 6.50 usec
TE 300.0 K
D1 2.00000000 sec
D11 0.03000000 sec
TD0 1

===== CHANNEL f1 =====
SFO1 100.6228293 MHz
NUC1 13C
P1 9.40 usec
SI 32768
SF 100.6127493 MHz
WDW EM
SSB 0
LB 1.00 Hz
GB 0
PC 1.40

```

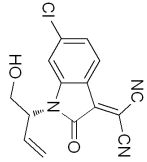

Table 2, entry 6

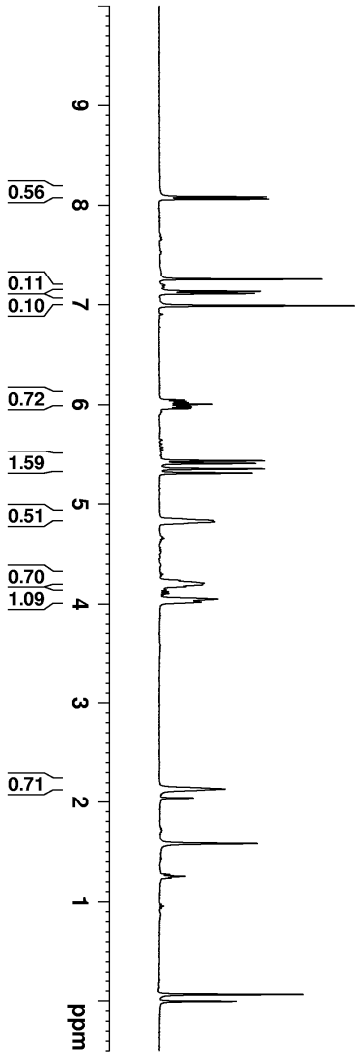

```

NAME LG
EXPNO 186
PROCNO 1
Date_ 20121123
Time 9.05
INSTRUM spect
PROBHD 5 mm PABDTL 13C
PULPROG zg30
TD 32768
SOLVENT CDCl3
NS 16
DS 0
SWH 12019.230 Hz
FIDRES 0.366798 Hz
AQ 1.3631988 sec
RG 203
DW 41.600 usec
DE 6.50 usec
TE 300.0 K
D1 2.00000000 sec
TD0 1

===== CHANNEL f1 =====
NUC1 1H
P1 12.60 usec
SI 65536
SF 400.1300182 MHz
WDW EM
SSB 0
LB 0.50 Hz
GB 0
PC 1.00

```

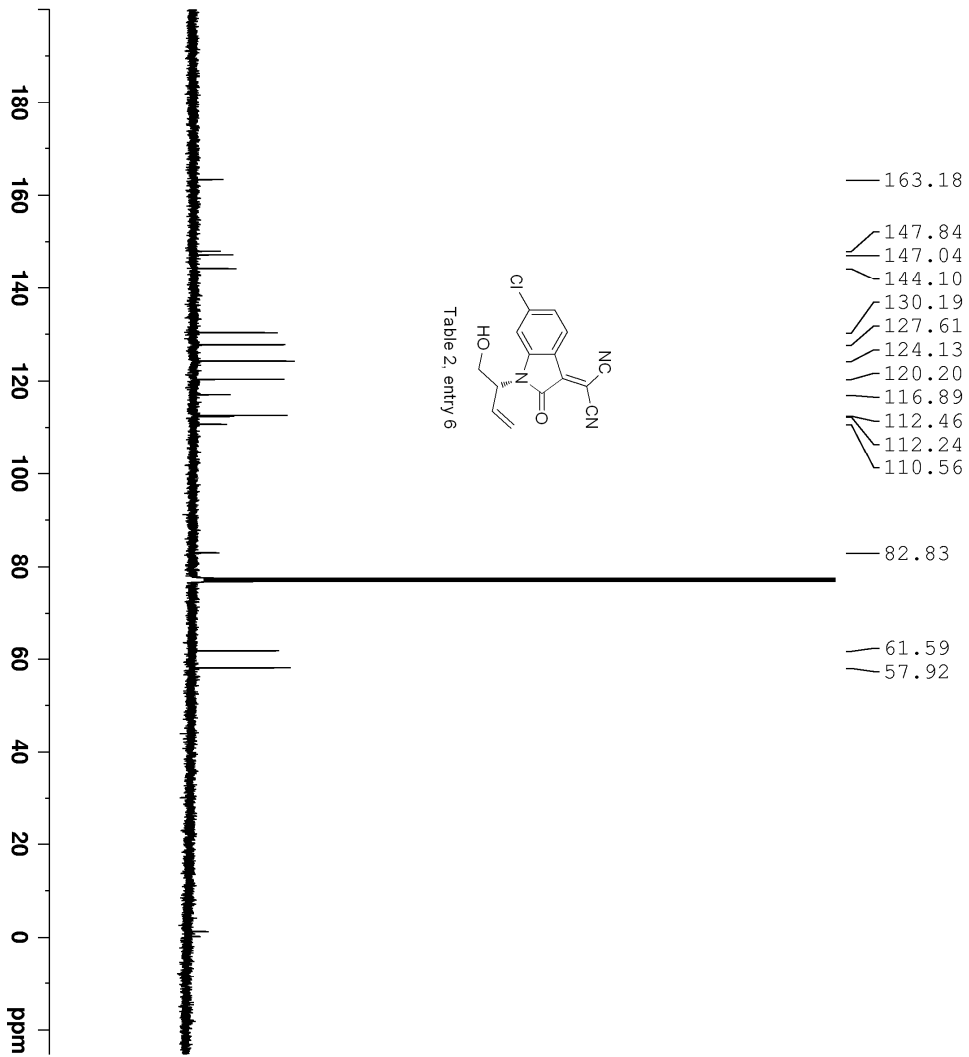

```

NAME 1G
EXPNO 187
PROCNO 1
Date_ 20121123
Time 13.19
INSTRUM spect
PROBHD 5 mm P4DUL 13C
PULPROG zgpg30
TD 32768
SOLVENT CDCl3
NS 3729
DS 0
SWH 25252.525 Hz
FIDRES 0.770646 Hz
AQ 0.6488564 sec
RG 203
DE 19.800 usec
DW 6.50 usec
TE 300.0 K
D1 2.00000000 sec
D11 0.03000000 sec
TD0 1

===== CHANNEL f1 =====
NUC1 13C
P1 9.40 usec
SI 32768
SF 100.6127494 MHz
WDW EM
SSB 0
LB 1.00 Hz
GB 0
PC 1.40

```

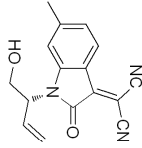

Table 2, entry 7

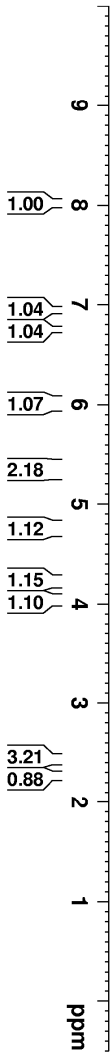

```

NAME          LG-xin
EXPNO         26
PROCNO        1
Date_         20140313
Time          4.20
INSTRUM       spect
PROBHD        5 mm PABD113C
PULPROG       zg30
TD            32768
SOLVENT       CDCl3
NS            16
DS            0
SWH           12019.230 Hz
FIDRES        0.366798 Hz
AQ            1.3631988 sec
RG            203
DW            41.600 usec
DE            6.50 usec
TE            300.0 K
D1            2.00000000 sec
TD0           1

===== CHANNEL f1 =====
SFO1          400.1320007 MHz
NUC1          1H
P1            12.60 usec
SI            65536
SF            400.1300092 MHz
WDW           EM
SSB           0
LB            0.50 Hz
GB            0
PC            1.00
  
```

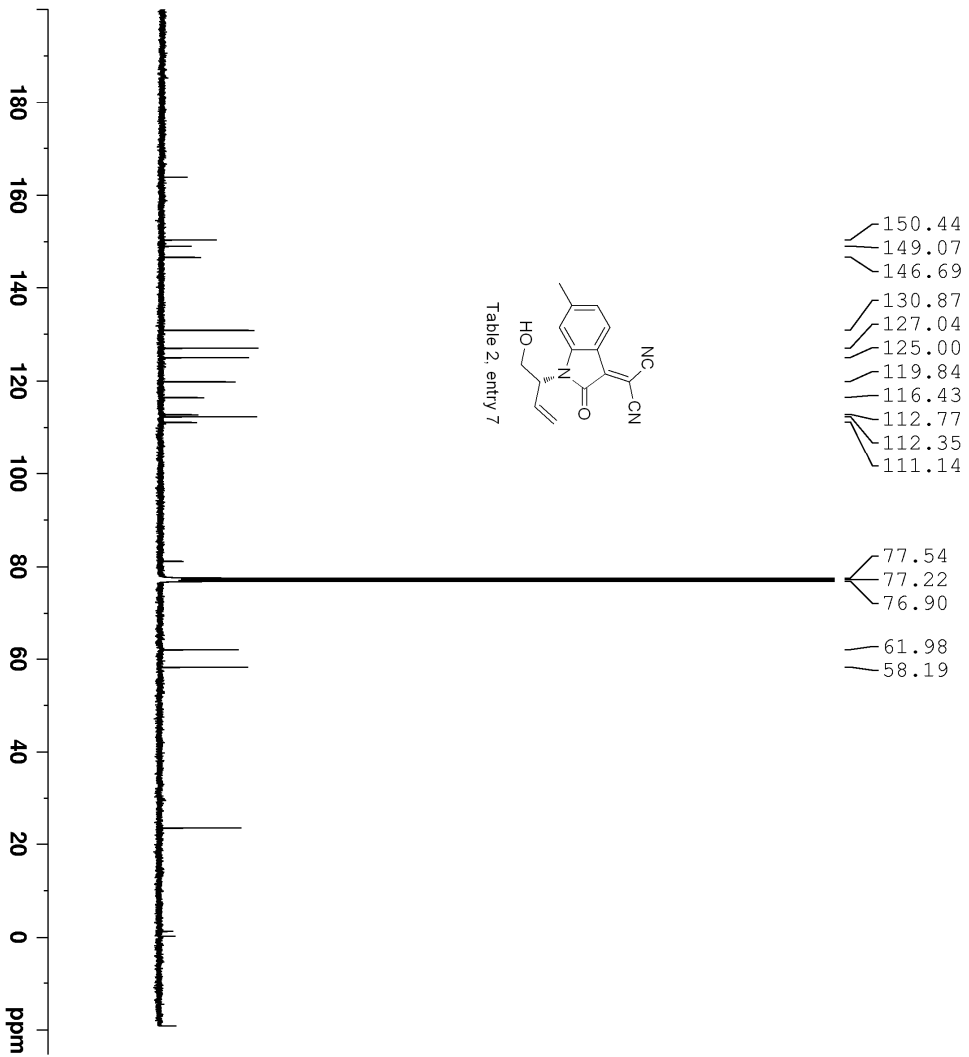

```

NAME          LG-x-in
EXPNO         27
PROCNO        1
Date_         20140313
Time         14.50
INSTRUM       5 mm PABUL
PROBHD        spect
PULPROG       zpgpg30
TD            65536
SOLVENT       CDCl3
NS            5791
DS            4
SWH           24038.461 Hz
FIDRES        0.366798 Hz
AQ            1.3631988 sec
RG            203
DE            20.800 usec
TE            300.0 K
D1            2.00000000 sec
D11           0.03000000 sec
TD0           1

===== CHANNEL f1 =====
SFO1          100.6228293 MHz
NUC1          13C
P1            9.40 usec
SI            32768
SF            100.6127485 MHz
WDW           EM
SSB           0
LB            1.00 Hz
GB            0
PC            1.40

```

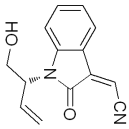

Table 2, entry 8

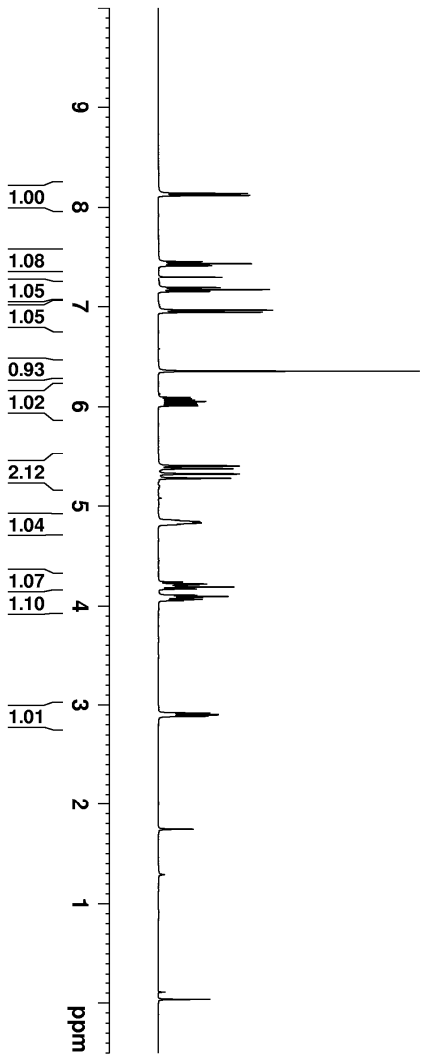

```

NAME LG
EXPNO 207
PROCNO 1
Date_ 20121202
Time 6.05
INSTRUM spect
PROBHD 5 mm PABD113C
PULPROG zg30
TD 32768
SOLVENT CDCl3
NS 16
DS 0
SWH 12019.230 Hz
FIDRES 0.366798 Hz
AQ 1.3631988 sec
RG 181
DW 41.600 usec
DE 6.50 usec
TE 293.3 K
D1 2.00000000 sec
TDO 1

===== CHANNEL f1 =====
NUC1 1H
P1 12.60 usec
SI 65536
SF 400.1300000 MHz
WDW EM
SSB 0
LB 0.50 Hz
GB 0
PC 1.00

```

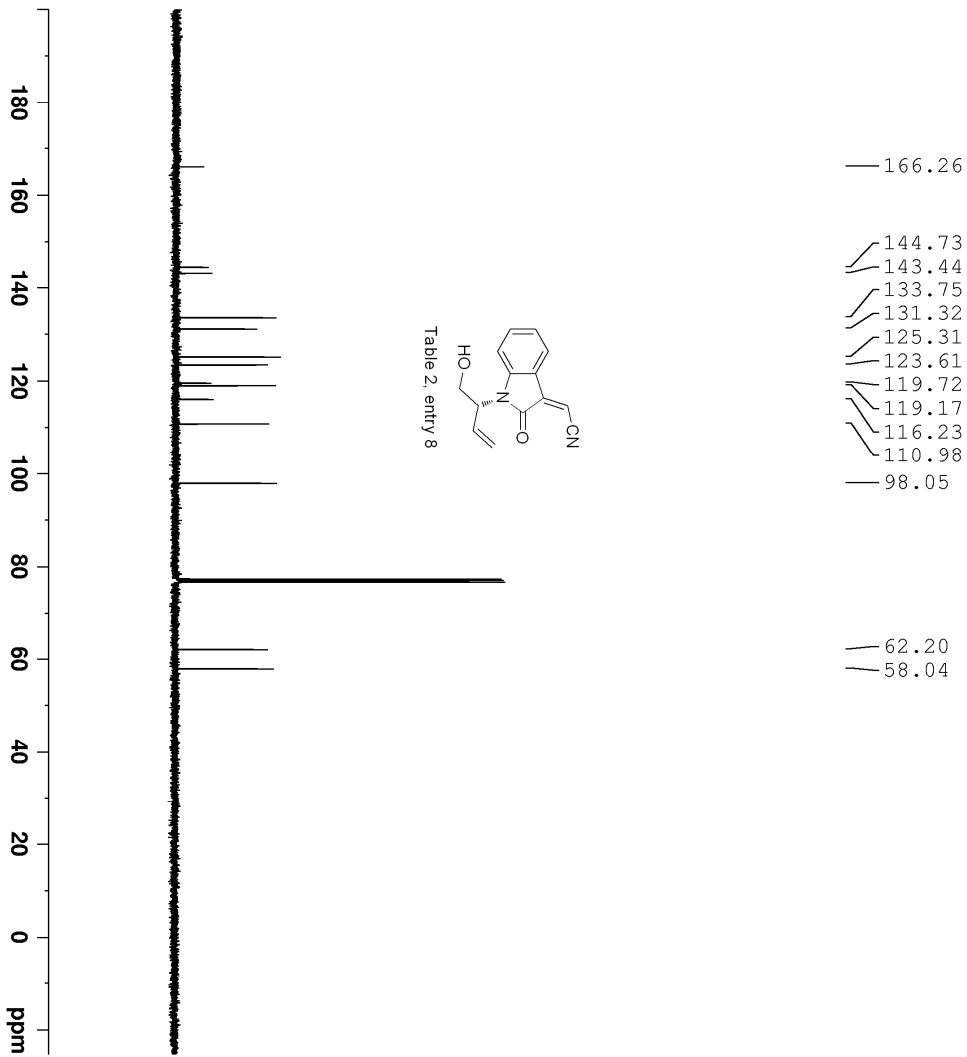

```

NAME          TG
EXPNO         208
PROCNO        1
Date_         20121202
Time         6.08
INSTRUM      spect
PROBHD       5 mm P4DUL 13C
PULPROG      zgpg30
TD           32768
SOLVENT      CDCl3
NS           118
DS           0
SWH          25252.525 Hz
FIDRES       0.770646 Hz
AQ           0.6488564 sec
RG           203
DE           19.800 usec
DW           6.50 usec
TE           294.0 K
D1           2.00000000 sec
D11          0.03000000 sec
TD0          1

===== CHANNEL f1 =====
NUC1         13C
P1           9.40 usec
SI           32768
SF           100.6127690 MHz
WDW          EM
SSB          0
LB           1.00 Hz
GB           0
PC           1.40

```

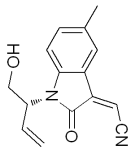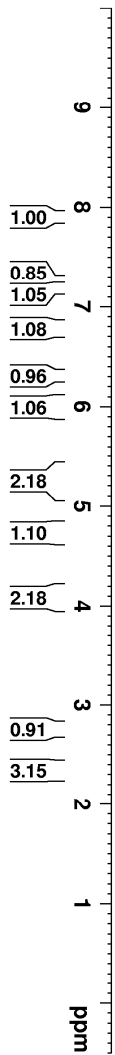

```

NAME          LG-xin
EXPNO         33
PROCNO       1
Date_        20140318
Time         2.43
INSTRUM      spect
PROBHD       5 mm PABD113C
PULPROG      zg30
TD           32768
SOLVENT      CDCl3
NS           7
DS           0
SWH          12019.230 Hz
FIDRES       0.366798 Hz
AQ           1.3631988 sec
RG           203
DW           41.600 usec
DE           6.50 usec
TE           300.0 K
D1           2.00000000 sec
TD0          1

===== CHANNEL f1 =====
SFO1         400.1320007 MHz
NUC1         1H
P1           12.60 usec
SI           65536
SF           400.1300088 MHz
WDW          EM
SSB          0
LB           0.50 Hz
GB           0
PC           1.00
  
```



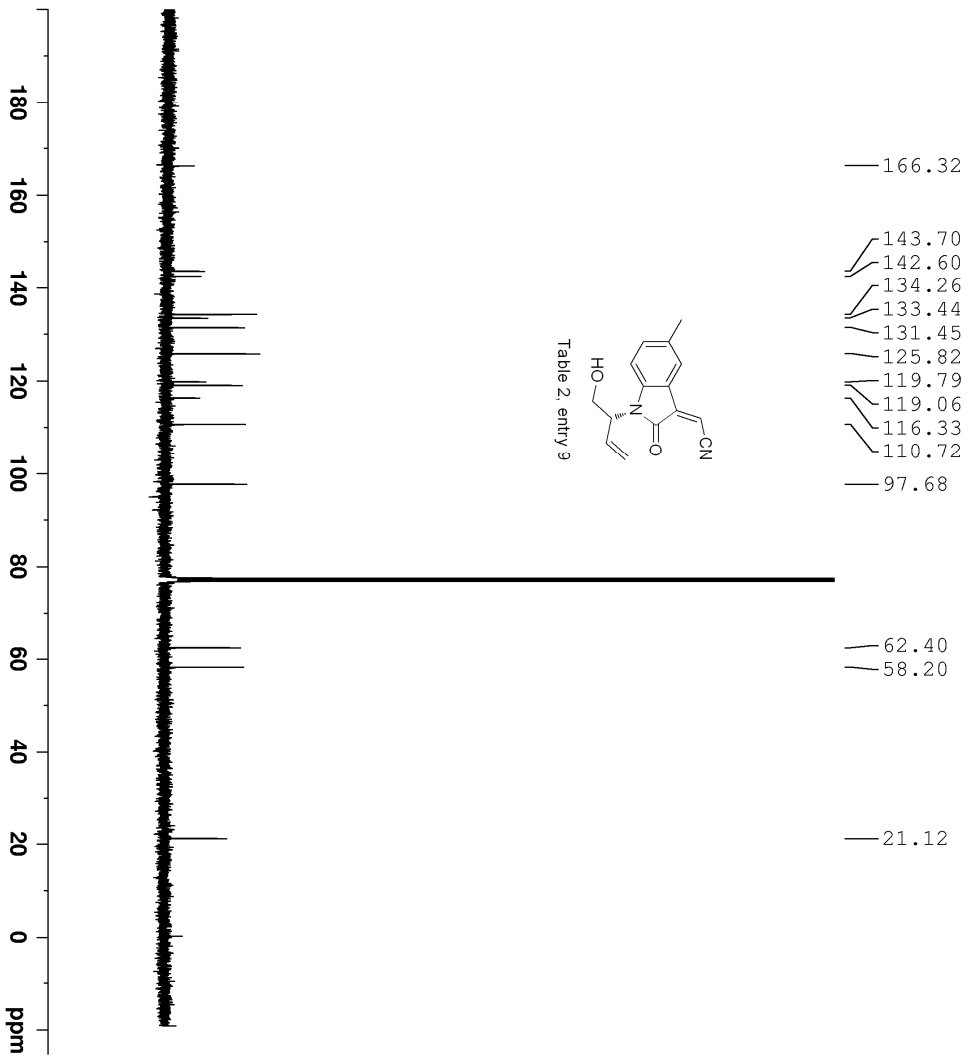

```

NAME LG-x.in
EXPNO 34
PROCNO 1
Date_ 20140318
Time 2.44
INSTRUM spect
PROBHD 5 mm PABUL 13C
PULPROG zgpg30
TD 65536
SOLVENT CDCl3
NS 513
DS 4
SWH 24038.461 Hz
FIDRES 0.366798 Hz
AQ 1.3631988 sec
RG 203
DW 20.800 usec
DE 6.50 usec
TE 300.0 K
D1 2.00000000 sec
D11 0.03000000 sec
TD0 1

===== CHANNEL f1 =====
SFO1 100.6228293 MHz
NUC1 13C
P1 9.40 usec
SI 32768
SF 100.6127485 MHz
WDW EM
SSB 0
LB 1.00 Hz
GB 0
PC 1.40

```

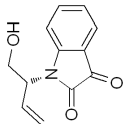

Table 2, entry 10

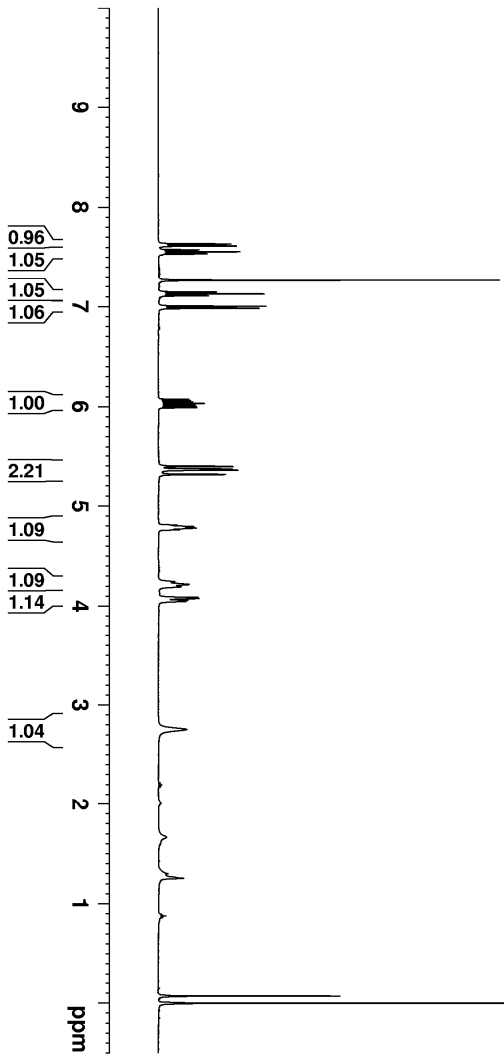

```

NAME          LG-xin
EXPNO         48
PROCNO        1
Date_         20140410
Time         3.17
INSTRUM       spect
PROBHD        5 mm PABDTL 13C
PULPROG       zg30
TD            32768
SOLVENT       CDCl3
NS            8
DS            0
SWH           12019.230 Hz
FIDRES        0.366798 Hz
AQ            1.3631988 sec
RG            203
DW            41.600 usec
DE            6.50 usec
TE            300.0 K
D1            2.00000000 sec
TD0           1

===== CHANNEL f1 =====
SFO1          400.1320007 MHz
NUC1          1H
P1            12.60 usec
SI            65536
SF            400.1300069 MHz
WDW           EM
SSB           0
LB            0.50 Hz
GB            0
PC            1.00
  
```

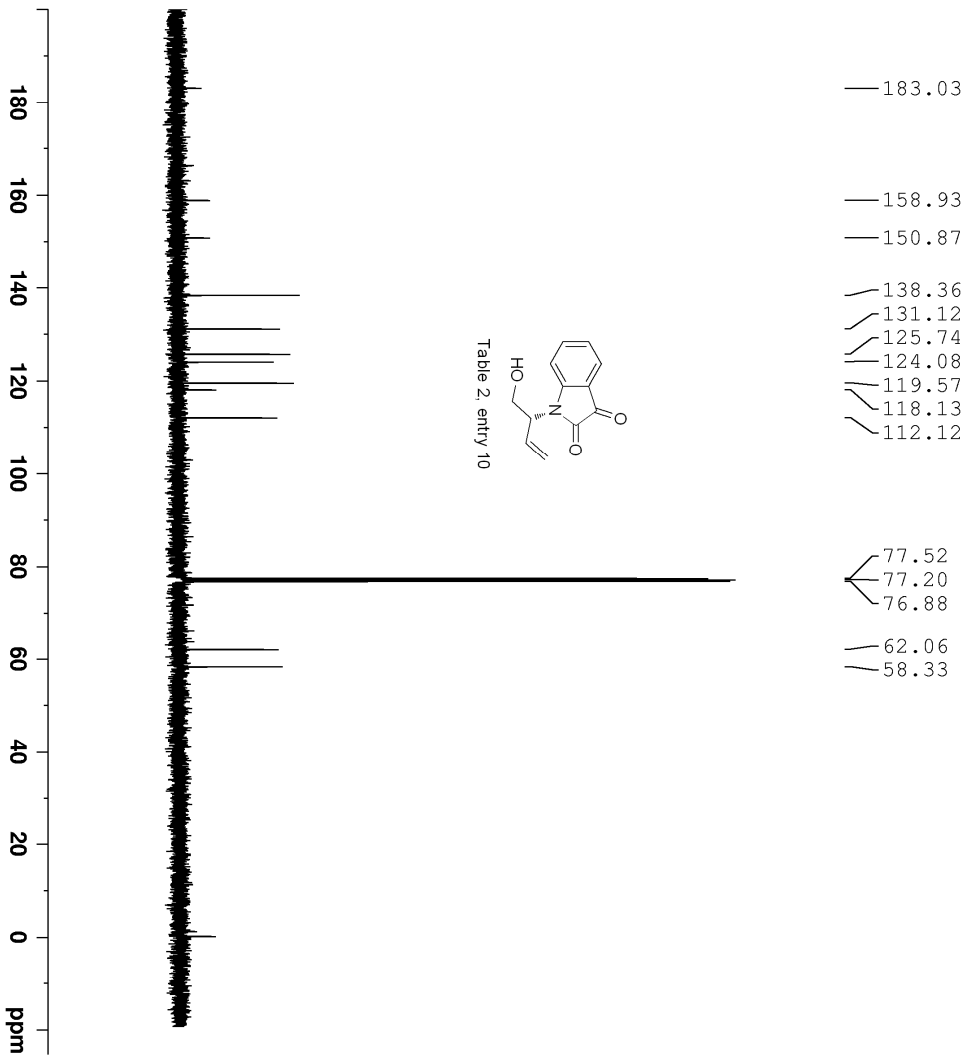

```

NAME LG-x-10
EXPNO 47
PROCNO 1
Date_ 20140410
Time 3.19
INSTRUM 5 mm PADU1
PROBHD spect
PULPROG zgpg30
TD 65536
SOLVENT CDCl3
NS 108
DS 4
SWH 24038.461 Hz
FIDRES 0.366798 Hz
AQ 1.3631988 sec
RG 203
DE 20.800 usec
DW 6.50 usec
TE 300.0 K
D1 2.00000000 sec
D11 0.03000000 sec
TD0 1

===== CHANNEL f1 =====
SFO1 100.6228293 MHz
NUC1 13C
P1 9.40 usec
SI 32768
SF 100.6127519 MHz
WDW EM
SSB 0
LB 1.00 Hz
GB 0
PC 1.40

```

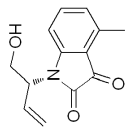

Table 2, entry 11

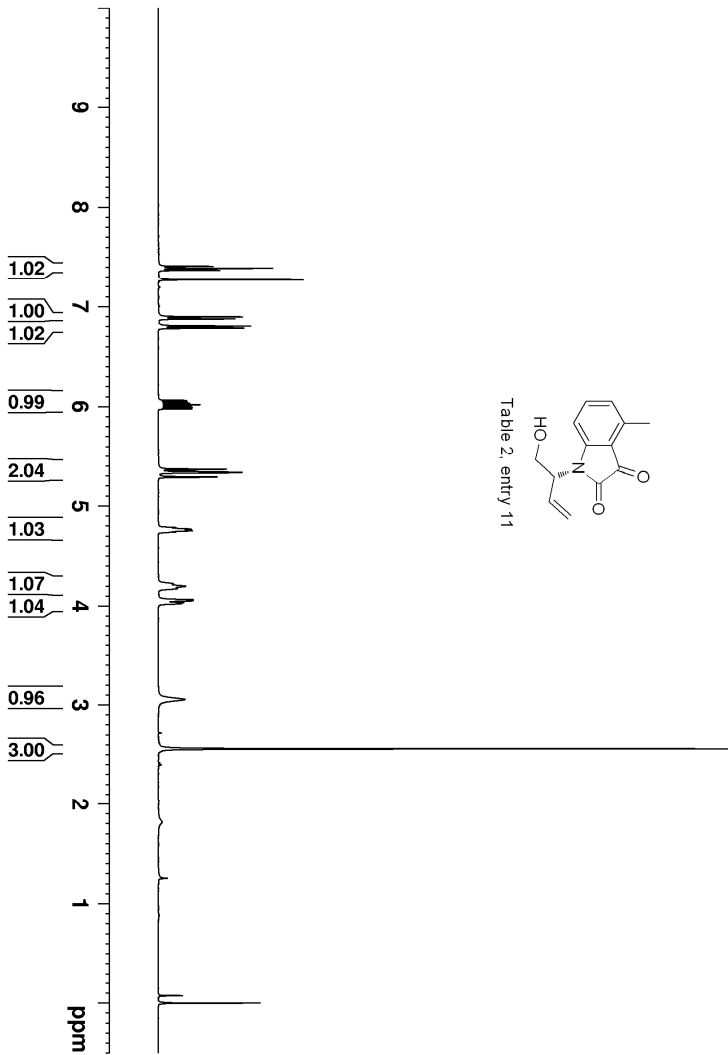

```

NAME LG-xin
EXPNO 54
PROCNO 1
Date_ 20140416
Time 7.48
INSTRUM spect
PROBHD 5 mm PABD113C
PULPROG zg30
TD 32768
SOLVENT CDCl3
NS 6
DS 0
SWH 12019.230 Hz
FIDRES 0.366798 Hz
AQ 1.3631988 sec
RG 101
DW 41.600 usec
DE 6.50 usec
TE 300.0 K
D1 2.00000000 sec
TD0 1

===== CHANNEL f1 =====
SFO1 400.1320007 MHz
NUC1 1H
P1 12.60 usec
SI 65536
SF 400.1300043 MHz
WDW EM
SSB 0
LB 0
GB 0
PC 1.00

```

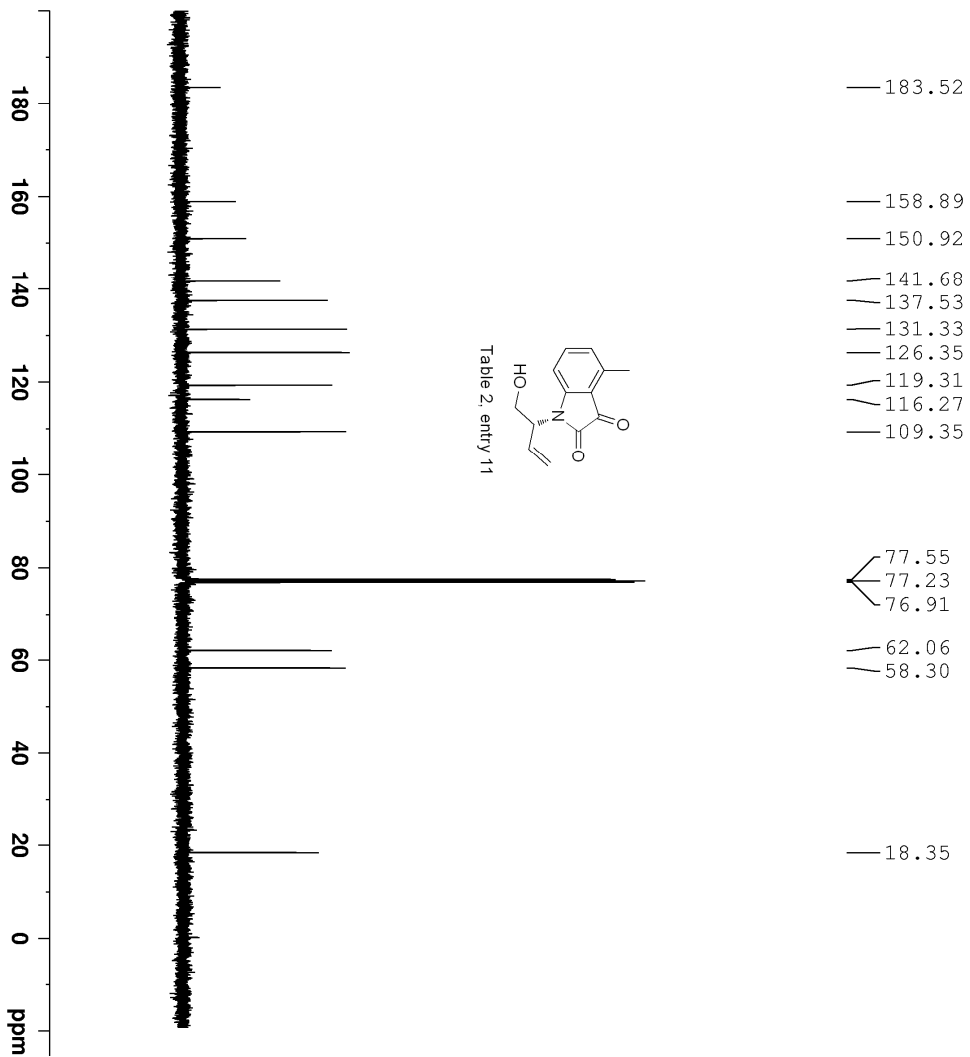

- 183.52
- 158.89
- 150.92
- 141.68
- 137.53
- 131.33
- 126.35
- 119.31
- 116.27
- 109.35
- 77.55
- 77.23
- 76.91
- 62.06
- 58.30
- 18.35

```

NAME LG-x-in
EXPNO 55
PROCNO 1
Date_ 20140416
Time 7.50
INSTRUM spect
PROBHD 5 mm PABUL 13C
PULPROG zgpg30
TD 65536
SOLVENT CDCl3
NS 77
DS 4
SWH 24038.461 Hz
FIDRES 0.366798 Hz
AQ 1.3631988 sec
RG 203
DE 20.800 usec
DW 6.50 usec
TE 300.0 K
D1 2.00000000 sec
D11 0.03000000 sec
TD0 1

===== CHANNEL f1 =====
SFO1 100.6228293 MHz
NUC1 13C
P1 9.40 usec
SI 32768
SF 100.6127516 MHz
WDW EM
SSB 0
LB 1.00 Hz
GB 0
PC 1.40

```

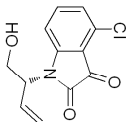

Table 2, entry 12

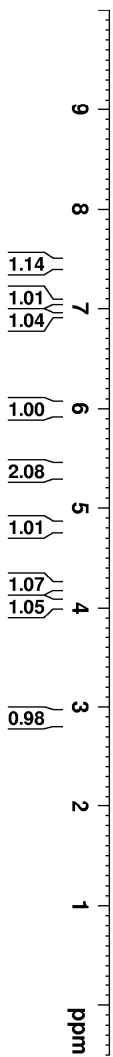

```

NAME          LG-xin
EXPNO         56
PROCNO        1
Date_         20140416
Time          7.55
INSTRUM       spect
PROBHD        5 mm PABD113C
PULPROG       zg30
TD            32768
SOLVENT       CDCl3
NS            5
DS            0
SWH           12019.230 Hz
FIDRES        0.366798 Hz
AQ            1.3631988 sec
RG            203
DW            41.600 usec
DE            6.50 usec
TE            300.0 K
D1            2.00000000 sec
TD0           1

===== CHANNEL f1 =====
SFO1          400.1320007 MHz
NUC1          1H
P1            12.60 usec
SI            65536
SF            400.1300058 MHz
WDW           EM
SSB           0
LB            0.50 Hz
GB            0
PC            1.00
  
```

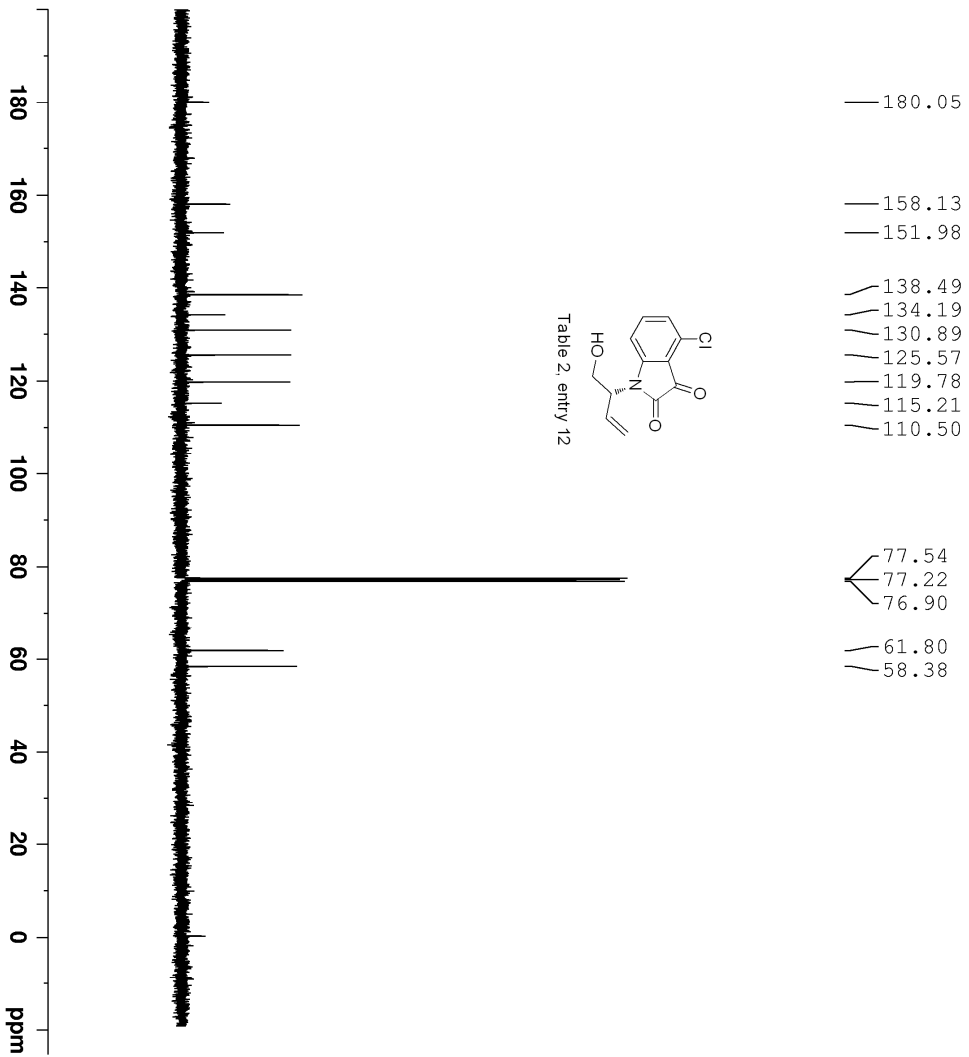

```

NAME LG-x-11n
EXPNO 57
PROCNO 1
Date_ 20140416
Time 7.58
INSTRUM spect
PROBHD 5 mm PABUL 13C
PULPROG zgpg30
TD 65536
SOLVENT CDCl3
NS 100
DS 4
SWH 24038.461 Hz
FIDRES 0.366798 Hz
AQ 1.3631988 sec
RG 203
DW 20.800 usec
DE 6.50 usec
TE 300.0 K
D1 2.00000000 sec
D11 0.03000000 sec
TD0 1

===== CHANNEL f1 =====
SFO1 100.6228293 MHz
NUC1 13C
P1 9.40 usec
SI 32768
SF 100.6127513 MHz
WDW EM
SSB 0
LB 1.00 Hz
GB 0
PC 1.40

```

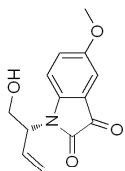

Table 2, entry 13

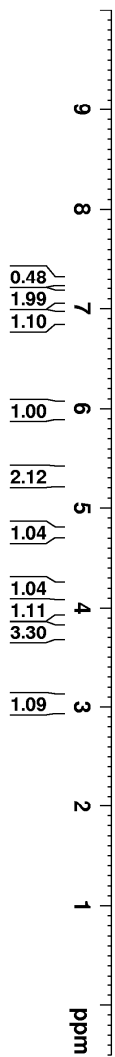

```

NAME          LG-xin
EXPNO         45
PROCNO       1
Date_        20140410
Time         3.10
INSTRUM      spect
PROBHD       5 mm PABDTL 13C
PULPROG      zg30
TD           32768
SOLVENT      CDCl3
NS           16
DS           0
SWH          12019.230 Hz
FIDRES       0.366798 Hz
AQ           1.3631988 sec
RG           128
DW           41.600 usec
DE           6.50 usec
TE           300.0 K
D1           2.00000000 sec
TD0          1

===== CHANNEL f1 =====
SFO1         400.1320007 MHz
NUC1         1H
P1          12.60 usec
SI          65536
SF          400.1300027 MHz
WDW         EM
SSB         0
LB          0.50 Hz
GB          0
PC          1.00
  
```



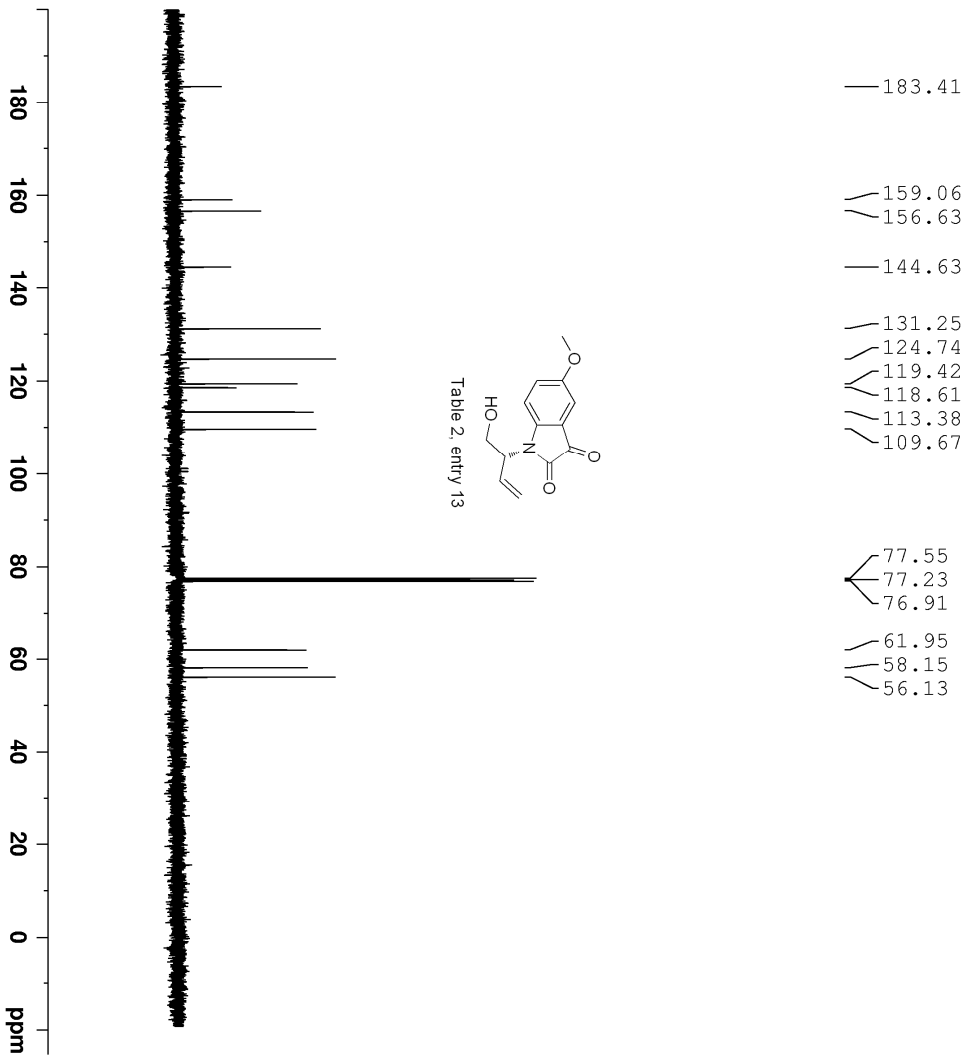

```

NAME LG-x-in
EXPNO 46
PROCNO 1
Date_ 20140410
Time 3.12
INSTRUM spect
PROBHD 5 mm PABUL 13C
PULPROG zgpg30
TD 65536
SOLVENT CDCl3
NS 39
DS 4
SWH 24038.461 Hz
FIDRES 0.366798 Hz
AQ 1.3631988 sec
RG 203
DE 20.800 usec
DW 6.50 usec
TE 300.0 K
D1 2.00000000 sec
D11 0.03000000 sec
TD0 1

===== CHANNEL f1 =====
SFO1 100.6228293 MHz
NUC1 13C
P1 9.40 usec
SI 32768
SF 100.6127519 MHz
WDW EM
SSB 0
LB 1.00 Hz
GB 0
PC 1.40

```

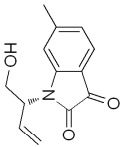

Table 2, entry 14

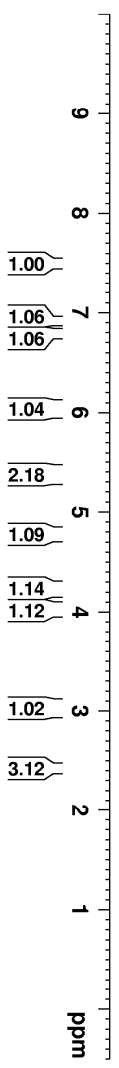

```

NAME          LG-xin
EXPNO         41
PROCNO       1
Date_        20140409
Time         6.13
INSTRUM      spect
PROBHD       5 mm PABD1 13C
PULPROG      zg30
TD           32768
SOLVENT      CDCl3
NS           9
DS           0
SWH          12019.230 Hz
FIDRES       0.366798 Hz
AQ           1.3631988 sec
RG           128
DW           41.600 usec
DE           6.50 usec
TE           300.0 K
D1           2.00000000 sec
TD0          1

===== CHANNEL f1 =====
SFO1         400.1320007 MHz
NUC1         1H
P1           12.60 usec
SI           65536
SF           400.1300035 MHz
WDW          EM
SSB          0
LB           0.50 Hz
GB           0
PC           1.00
  
```

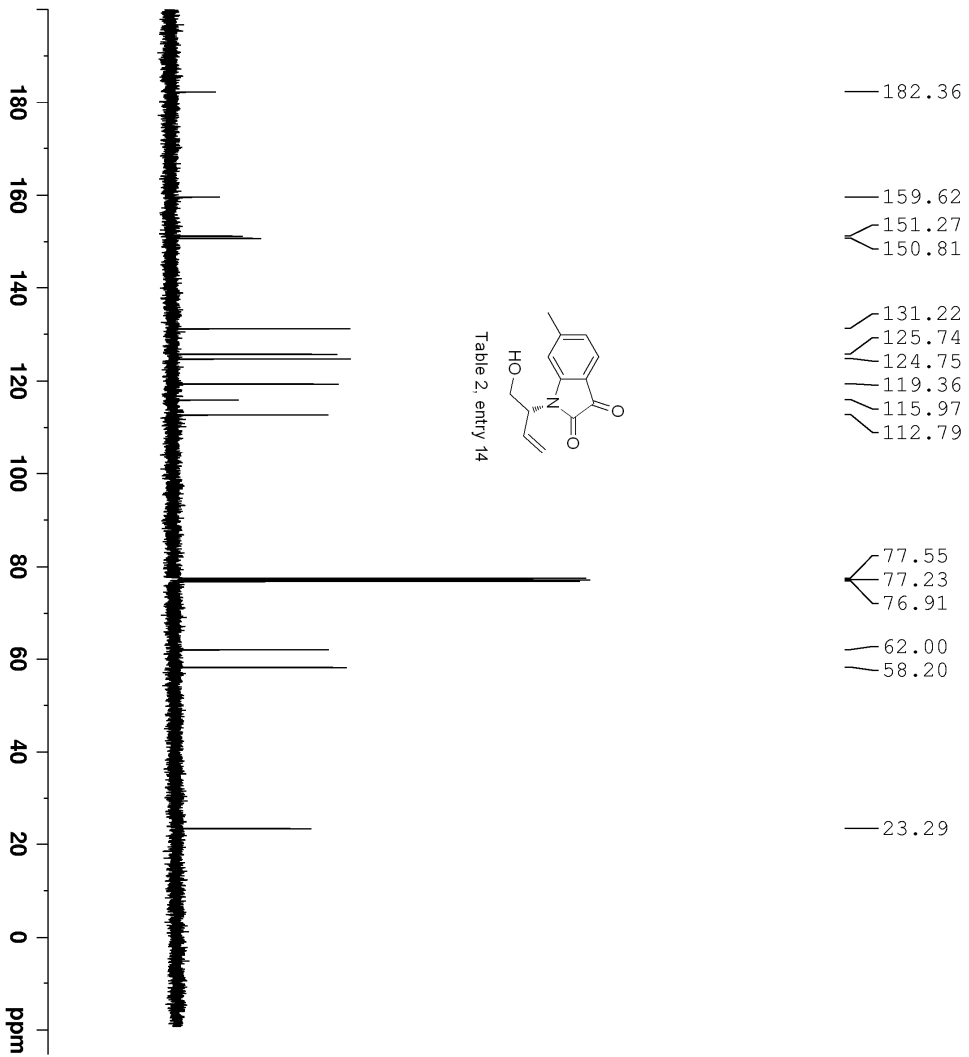

- 182.36
- 159.62
- 151.27
- 150.81
- 131.22
- 125.74
- 124.75
- 119.36
- 115.97
- 112.79
- 77.55
- 77.23
- 76.91
- 62.00
- 58.20
- 23.29

```

NAME          LG-x-in
EXPNO         42
PROCNO        1
Date_         20140409
Time         6.16
INSTRUM       5 mm P4DUL
PROBHD        13C
PULPROG       zgpg30
TD            65536
SOLVENT       CDCl3
NS            85
DS            4
SWH           24038.461 Hz
FIDRES        0.366798 Hz
AQ            1.3631988 sec
RG            203
DE            20.800 usec
DW            6.50 usec
TE            300.0 K
D1            2.00000000 sec
D11           0.03000000 sec
TD0           1

===== CHANNEL f1 =====
SFO1          100.6228293 MHz
NUC1          13C
P1            9.40 usec
SI            32768
SF            100.6127516 MHz
WDW           EM
SSB           0
LB            1.00 Hz
GB            0
PC            1.40
  
```

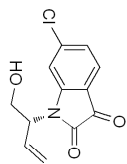

Table 2, entry 15

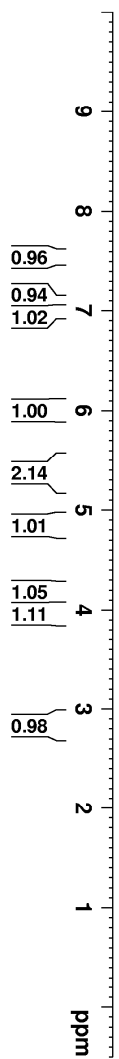

```

NAME          LG-xin
EXPNO         49
PROCNO       1
Date_        20140412
Time         4.45
INSTRUM      spect
PROBHD       5 mm PABD113C
PULPROG      zg30
TD           32768
SOLVENT      CDCl3
NS           9
DS           0
SWH          12019.230 Hz
FIDRES       0.366798 Hz
AQ           1.3631988 sec
RG           203
DW           41.600 usec
DE           6.50 usec
TE           300.0 K
D1           2.00000000 sec
TD0          1

===== CHANNEL f1 =====
SFO1         400.1320007 MHz
NUC1         1H
P1          12.60 usec
SI          65536
SF          400.1300052 MHz
WDW         EM
SSB         0
LB          0.50 Hz
GB          0
PC          1.00
  
```

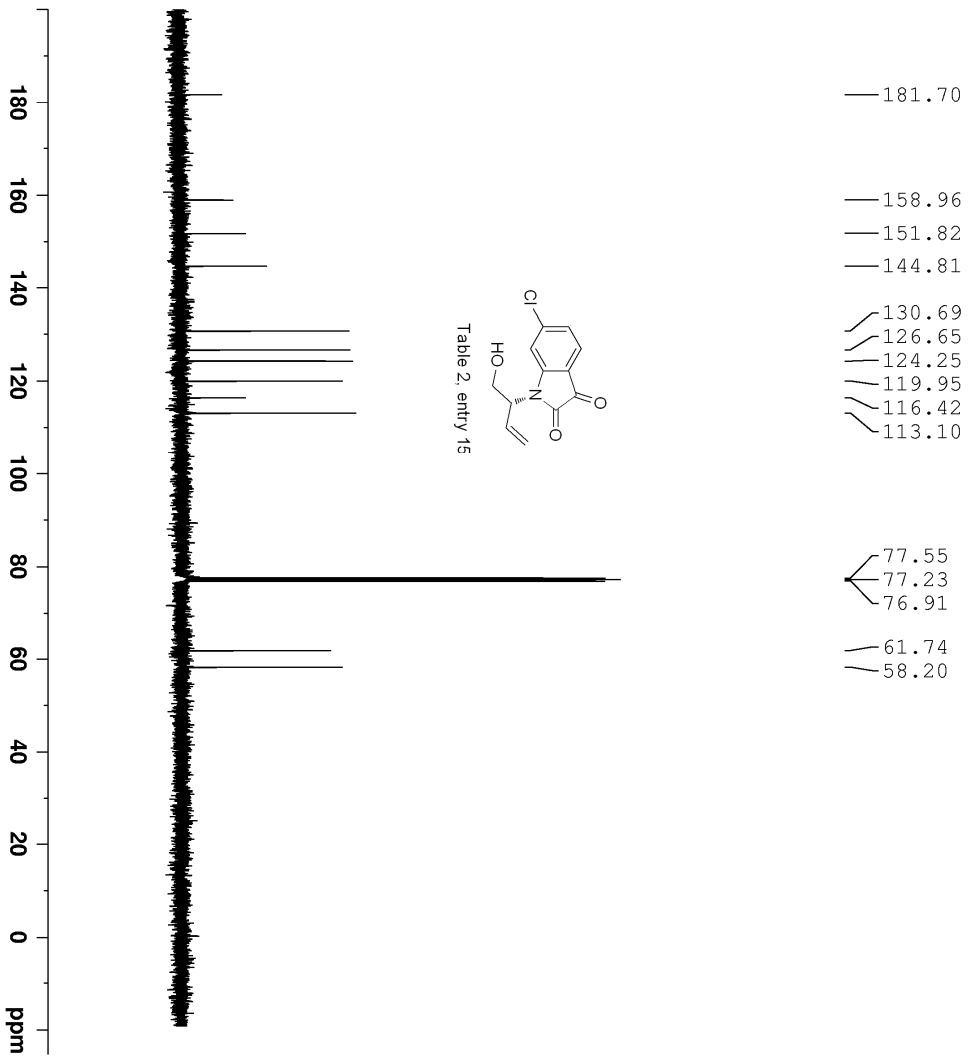

```

NAME LG-x-in
EXPNO 50
PROCNO 1
Date_ 20140412
Time 4.46
INSTRUM spect
PROBHD 5 mm PABUL 13C
PULPROG zgpg30
TD 65536
SOLVENT CDCl3
NS 71
DS 4
SWH 24038.461 Hz
FIDRES 0.366798 Hz
AQ 1.3631988 sec
RG 203
DE 20.800 usec
DW 6.50 usec
TE 300.0 K
D1 2.00000000 sec
D11 0.03000000 sec
TD0 1

===== CHANNEL f1 =====
SFO1 100.6228293 MHz
NUC1 13C
P1 9.40 usec
SI 32768
SF 100.6127513 MHz
WDW EM
SSB 0
LB 1.00 Hz
GB 0
PC 1.40

```
